1 **Transcription factor TAp73 and microRNA-449 complement each other to support**  
2 **multiciliogenesis**

3

4 **Running title:** TAp73 and miR449 cooperate in multiciliogenesis

5 Merit Wildung<sup>1,\*</sup>, Tilman Uli Esser<sup>1,\*</sup>, Katie Baker Grausam<sup>2,3</sup>, Cornelia Wiedwald<sup>1</sup>, Larisa  
6 Volceanov-Hahn<sup>1</sup>, Dietmar Riedel<sup>4</sup>, Sabine Beuermann<sup>1</sup>, Li Li<sup>2</sup>, Jessica Zylla<sup>2</sup>, Ann-Kathrin  
7 Guenther<sup>5</sup>, Magdalena Wienken<sup>6</sup>, Evrim Ercetin<sup>1</sup>, Zhiyuan Han<sup>7</sup>, Felix Bremmer<sup>8</sup>, Orr Shomroni<sup>9</sup>,  
8 Stefan Andreas<sup>1</sup>, Haotian Zhao<sup>2,3,7,#</sup> and Muriel Lizé<sup>1,#</sup>

9

10 \* = equal contribution; # = corresponding authors

- 11 1) Molecular & Experimental Pneumology Group, Clinic for Cardiology and Pneumology,  
12 University Medical Center Goettingen, Germany  
13 2) Cancer Biology and Immunotherapeutics Group, Sanford Research, Sioux Falls, South  
14 Dakota, USA  
15 3) Division of Basic Biomedical Sciences, University of South Dakota, Sanford School of  
16 Medicine, Vermillion, South Dakota  
17 4) Electron Microscopy, Max-Planck-Institute for Biophysical Chemistry, Goettingen,  
18 Germany  
19 5) Department of Genes and Behavior, MPI for Biophysical Chemistry, Goettingen, Germany  
20 6) Institute of Molecular Oncology, University Medical Center Goettingen, Germany  
21 7) Department of Biomedical Sciences, New York Institute of Technology College of  
22 Osteopathic Medicine, Old Westbury, New York, USA  
23 8) Institute of Pathology, University Medical Center Goettingen, Goettingen, Germany  
24 9) Microarray and Deep-Sequencing Core Facility, University Medical Center Goettingen,  
25 Germany

26

27 **Corresponding authors**

28 Muriel Lizé, University Medical Center Goettingen, Clinic for Cardiology and Pneumology, section  
29 Molecular & Experimental Pneumology, email: [mlize@gwdg.de](mailto:mlize@gwdg.de)

30 Haotian Zhao, Department of Biomedical Sciences, New York Institute of Technology College of  
31 Osteopathic Medicine, Riland Building Room 027, Old Westbury, New York 11568-8000.

32 Telephone: (516) 686-1271; Fax: (516) 686-1454; email: [hzhao10@nyit.edu](mailto:hzhao10@nyit.edu)

33 **Abstract**

34 Motile cilia serve vital functions in development, homeostasis and regeneration. We recently  
35 demonstrated that TAp73 is an essential transcriptional regulator of respiratory multiciliogenesis.  
36 Here, we show that TAp73 is expressed in multiciliated cells (MCCs) of diverse tissues. Analysis  
37 of *TAp73* mutant animals revealed that TAp73 regulates *Foxj1*, *Rfx2*, *Rfx3*, axonemal dyneins  
38 *Dnali1* and *Dnai1*, plays a pivotal role in the generation of MCCs in male and female reproductive  
39 ducts, and contributes to fertility. However, the function of MCCs in the brain appears to be  
40 preserved despite the loss of *TAp73*, and robust activity of cilia-related networks is maintained in  
41 the absence of *TAp73*. Notably, *TAp73* loss leads to distinct changes in ciliogenic microRNAs:  
42 *miR34bc* expression is reduced, whereas the *miR449* cluster is induced in diverse multiciliated  
43 epithelia. Among different MCCs, choroid plexus (CP) epithelial cells in the brain display prominent  
44 *miR449* expression, whereas brain ventricles exhibit significant increase in *miR449* levels along  
45 with an increase in the activity of ciliogenic E2F4/MCIDAS circuit in *TAp73* mutant animals.  
46 Conversely, E2F4 induces robust transcriptional response from *miR449* genomic regions. To  
47 address whether increased *miR449* levels in the brain maintain the multiciliogenesis program in  
48 the absence of *TAp73*, we deleted both *TAp73* and *miR449* in mice. Although loss of *miR449*  
49 alone led to a mild ciliary defect in the CP, more pronounced ciliary defects and hydrocephalus  
50 were observed in the brain lacking both *TAp73* and *miR449*. In contrast, *miR449* loss in other  
51 MCCs failed to enhance ciliary defects associated with *TAp73* loss. Together, our study shows  
52 that, in addition to the airways, TAp73 is essential for generation of MCCs in male and female  
53 reproductive ducts, whereas *miR449* and TAp73 complement each other to support  
54 multiciliogenesis and CP development in the brain.

## 55 Introduction

56 Cilia are hair-like appendages protruding from the cell membrane into the surrounding  
57 environment. Solitary immotile primary cilia are a common organelle in most mammalian cells,  
58 whereas motile cilia are restricted to a subset of cell types. This subset includes multiciliated cells  
59 (MCCs) lining brain ventricles, tracheal, and bronchial epithelium as well as the epithelium of male  
60 efferent ducts (EDs) and fallopian tubes (FTs) in females [1].

61 Multiciliogenesis requires precise regulation of the production, transport and assembly of a large  
62 number of different structural components, a process critically dependent on a hierarchical  
63 network of transcriptional and post-transcriptional regulators [2]. Geminin Coiled-Coil Domain  
64 Containing 1 (GEMC1) [3–5] and multiciliate differentiation and DNA synthesis associated cell  
65 cycle protein (MCIDAS or Multicilin) [6–8], members of the Geminin family, are early regulators of  
66 the MCC fate, downstream of the NOTCH pathway. MCC differentiation is also regulated by post-  
67 transcriptional mechanisms including microRNAs (miRNAs). *miR-34/449* constitute a conserved  
68 family that encodes six homologous miRNAs (*miR34a*, *34b*, *34c*, *449a*, *449b*, and *449c*) from  
69 three genomic loci in vertebrates. Inhibition of the NOTCH pathway e.g. by *miR449* is required for  
70 multiciliogenesis through de-repression of the transcriptional network of *GEMC1*, *MCIDAS*, E2F  
71 transcription factors (*E2F4*, *E2F5*), forkhead box J1 (*FOXJ1*), and v-myb avian myeloblastosis  
72 viral oncogene homolog (*MYB*) [9–11]. Disturbance of the molecular circuit leads to defective  
73 multiciliogenesis and ciliopathies in the airways, reproductive tracts, and the brain [1].

74 Transformation related protein 73 (*Trp73*) is a member of the p53 family with distinct isoforms  
75 generated from two alternative promoters: isoforms containing the N-terminal transactivation  
76 domain (TAp73), and N-terminally truncated dominant-negative isoforms ( $\Delta$ Np73). Recently, we  
77 and others showed that TAp73 is essential for airway multiciliogenesis [12,13]. Gene expression  
78 analysis and chromatin immunoprecipitation (ChIP) identified TAp73 as a critical regulator of  
79 multiciliogenesis: TAp73 acts downstream of E2F4/MCIDAS and regulates the expression of  
80 *FOXJ1*, *RFX2*, and *RFX3* in pulmonary tissues [12,14–17].

81 The FT of female reproductive tract consists of MCCs that possess hundreds of motile cilia beating  
82 in a wave-like manner which, along with musculature contraction, moves the oocyte or zygote  
83 towards the uterus [18–20]. Defects in ciliary functions may lead to ectopic pregnancies or infertility  
84 [19,21]. In the male reproductive tract, MCCs in the EDs are involved in the transport of  
85 spermatozoa from testis to epididymis (Epi), their maturation and concentration [22–25].  
86 MCCs in the brain can be found in a single layer of ependymal cells facing the ventricles and  
87 choroid plexus (CP). The CP epithelium, a specialized secretory epithelium that secretes  
88 cerebrospinal fluid, arises from monociliated progenitors in the roof plate around embryonic day  
89 (E) 12 and undergoes multi-ciliate differentiation to form multiple primary cilia [26,27]. Ependymal  
90 cells in mice are specified around day E16 and form multiple motile cilia on the apical surface after  
91 birth to facilitate cerebrospinal fluid movement [28,29]. Defects in the ependymal and CP lineages  
92 are implicated in aging, hydrocephalus, and brain tumors [30,31].  
93 In this study, we detected robust *TAp73* expression in MCCs in diverse tissues. In reproductive  
94 ducts, *TAp73* loss leads to a profound reduction of multiciliogenesis and suppression of *TAp73*-  
95 dependent transcriptional network activity. However, MCCs in the brain maintain robust  
96 multiciliogenesis activity despite *TAp73* loss. Molecular studies revealed alterations in *miR-34/449*  
97 family members in diverse MCCs from *TAp73* mutant mice: decreased levels of *TAp73* target  
98 *miR34bc* concurrent with increased expression of *miR449*. In the brain, *miR449* is highly  
99 expressed in the CP and experiences significant upregulation following *TAp73* deletion. In  
100 addition, brain ventricles but no other multiciliated tissues from *TAp73* mutant animals exhibit  
101 increased expression of E2F4, which in turn is capable of eliciting robust transcriptional response  
102 from *miR449* genomic loci, suggesting that *miR449* plays a crucial role in brain multiciliogenesis  
103 in collaboration with *TAp73*. Indeed, *miR449* loss alone results in ciliary reduction in the CP,  
104 whereas loss of both *TAp73* and *miR449* leads to a dramatic reduction of multiciliogenesis in the  
105 CP and severe hydrocephalus. Therefore, the molecular network governing MCC fate is subjected  
106 to tissue-specific feedback modulation by transcriptional and post-transcriptional mechanisms.

## 107 **Materials and Methods**

### 108 **Animals**

109 *TAp73* mutant mice with a targeted deletion of exons 2 and 3 of the *Trp73* gene were a generous  
110 gift from Dr. Tak Mak (Princess Margaret Cancer Centre, *Toronto, Canada*) [32]. *miR449* mutants  
111 were previously described [33]. Both strains were maintained in C57Bl/6 background (n8) at the  
112 animal facility of the European Neuroscience Institute Goettingen, Germany in full compliance with  
113 institutional guidelines. The study was approved by the Animal Care Committee of the University  
114 Medical Centre Goettingen and the authorities of Lower-Saxony under the number 16/2069.

### 115 **Human samples**

116 Human epididymis samples were procured with informed consent from two patients (42 and 41  
117 years of age, respectively). All experimental procedures were approved and performed in  
118 accordance with the requirements set forth by Ethics Committee of the University Medical Centre  
119 Goettingen (application number: 18/2/16).

### 120 **Histology and immunostaining**

121 Paraformaldehyde-fixed, paraffin-embedded tissues were treated with heat-induced epitope  
122 retrieval using Rodent Decloaker (RD913 L, Biocare Medical, *Pacheco, CA, USA*). For  
123 immunohistochemistry, endogenous peroxidase activity was quenched with 3% H<sub>2</sub>O<sub>2</sub> for 10 min.  
124 Tissue sections were blocked with 10% fetal calf serum (FCS) in phosphate-buffered saline (PBS)  
125 with 0.1% Triton X-100, and subsequently incubated with primary antibodies (List of antibodies is  
126 provided in **Supplementary Table 1**). Biotinylated secondary antibodies were applied for 1 h at  
127 room temperature (List of antibodies is provided in **Supplementary Table 2**), after which avidin  
128 enzyme complex and substrate/chromogen were used for color development (Vector laboratories,  
129 *Burlingame, CA, USA*). Stained tissue sections were counterstained with hematoxylin. For  
130 immunofluorescence, sections were stained with fluorescently labeled secondary antibodies (List  
131 of antibodies is provided in **Supplementary Table 2**) for 1 h at room temperature. Nuclei were  
132 counterstained with 4', 6-Diamidin-2-phenylindol (DAPI). Histology of tissue sections was

133 assessed by using hematoxylin (Merck, *Darmstadt, Germany*) and eosin (Carl Roth, *Karlsruhe,*  
134 *Germany*) staining.

### 135 **Electron microscopy**

136 Transmission electron microscopy (TEM) was performed as previously described [12]. Briefly,  
137 murine tissue samples were fixed by immersion using 2% glutaraldehyde in 0.1 M cacodylate  
138 buffer (Science Services, *München, Germany*) at pH 7.4 overnight at 4°C. Post-fixation was  
139 performed using 1% osmium tetroxide diluted in 0.1 M cacodylate buffer. After pre-embedding  
140 staining with 1% uranyl acetate, tissue samples were dehydrated and embedded in Agar 100  
141 (Plano, *Wetzlar, Germany*). Thin tissue sections (100 nm) were examined using a Philips CM 120  
142 BioTwin transmission electron microscope (Philips Inc., *Eindhoven, The Netherlands*) and images  
143 were taken with a TemCam F416 CMOS camera (TVIPS, *Gauting, Germany*).

### 144 **Quantification of cilia markers**

145 Cilia were quantified using the *ImageJ* software [34]. Briefly, the region of interest was selected  
146 and a threshold was set to exclude unspecific background signals. The *Analyze Particles* tool was  
147 used to measure the area of the ciliary staining. Values were normalized to the length of the  
148 epithelia measured.

### 149 **Western blot**

150 Samples were homogenized in RIPA buffer (20 mM TrisHCl pH 7.5, 150 mM NaCl, 9.5 mM EDTA,  
151 1% Triton X100, 0.1% SDS, 1% sodium deoxycholate) supplemented with urea (2.7 M) and  
152 protease inhibitors (Complete Mini EDTA-free, Roche, *Basel, Switzerland*). Equal amounts of  
153 protein extracts were separated by SDS-polyacrylamide gels prior to transfer onto a nitrocellulose  
154 membrane and incubated with primary antibodies (List of antibodies is provided in  
155 **Supplementary Table 1**). The membrane was washed and incubated for 1 h with horse radish  
156 peroxidase (HRP)-conjugated secondary antibodies (List of antibodies is provided in  
157 **Supplementary Table 2**) followed by chemiluminescence detection.  $\beta$ -ACTIN or heat shock  
158 cognate 71 kDa protein (HSC70) were used as protein loading controls.

## 159 RNA extraction, quantitative PCR, small RNA sequencing, and RNAscope

160 Tissue samples were snap-frozen in liquid nitrogen and total RNA was isolated by Extrazol  
161 (7BioScience, *Hartheim, Germany*)/Chloroform extraction followed by 80% ethanol precipitation  
162 at -20°C. For cDNA synthesis, 1 µg of total RNA was incubated with the M-MuLV reverse  
163 transcriptase and a mix of random nonameric and polyA tail primers at 42°C for 1 h in a total  
164 volume of 50 µl. All reactions were set up in triplicate with self-made SYBR Green quantitative  
165 PCR (qPCR) Mix (Tris-HCl [75 mM], (NH<sub>4</sub>)<sub>2</sub>SO<sub>4</sub> [20 mM], Tween-20 [0.01% v/v], MgCl<sub>2</sub> [3 mM],  
166 Triton X-100 [0.25% v/v], SYBR Green I (1:40 000), dNTPs [0.2 mM] and Taq-polymerase [20  
167 U/ml]) using 250 nM of each gene-specific primer (List of primers is provided in **Supplementary**  
168 **Table 3**). Standard curve method was used to assess relative transcript content. Transcript of  
169 interests were normalized to the reference transcript of ribosomal phosphoprotein P0 (Rplp0, or  
170 *36b4*) and normalized to the mean value of control samples. The results for each sample were  
171 obtained by averaging transcript levels of technical triplicates. No RT controls and dilution curves  
172 as well as melting curves and gel electrophoresis assessment of amplicons were performed for  
173 all primer combinations. For *miR449a*, *miR34b*, and *miR34c* quantification, TaqMan MicroRNA  
174 Assay (Applied Biosystems, Thermo Fisher Scientific, *Waltham, MA, USA*) was performed  
175 according to the manufacturer's instructions with U6 snRNA as internal control.

176 Copy number in RNA samples was determined by qPCR using a murine TAp73 plasmid  
177 (MC219984, Origene, *Rockville, USA*) with a known copy number as standard curve. Copy  
178 number of the TAp73 plasmid was determined using the following formula: number of copies =  
179 (plasmid amount [ng] \* 6.022x10<sup>23</sup> [molecules/mole]) / (plasmid length [bp] \* 1x10<sup>9</sup> [ng/g] \* 650  
180 [g/mol])

181 The libraries for small RNA samples were prepared using TruSeq Small RNA Library Prep Kit -  
182 Set A (24 rxns) (Set A: indexes 1-12; Cat N°: RS-200-001, Illumina, *San Diego, CA, USA*) using  
183 1 µg of total RNA according to manufacturer's recommendations. Samples were sequenced on  
184 the Illumina HiSeq 4000 using a 50 bp single-end approach. Mapping, prediction of novel miRNAs,

185 quality control, and differential expression (DE) analysis were carried out using Oasis2.0 (*Oasis:*  
186 *online analysis of small RNA deep sequencing data*) [35]. In brief, FASTQ files were trimmed with  
187 cutadapt 1.7.1 [36] removing Truseq adapter sequences (TGGAATTCTCGGGTGCCAAGG)  
188 followed by removing sequences smaller than 15 or larger than 32 nucleotides. Trimmed FASTQ  
189 sequences were aligned to mouse small RNAs using STAR version 2.4.1d [37] with a mismatch  
190 of 5% of the sequence length and by utilizing the following databases: Mirbase version 21 for  
191 miRNAs; piRNAbank V.2 for piwiRNA; and Ensembl v84 for small nuclear RNA, small nucleolar  
192 RNA, and ribosomal RNA. Counts per small RNA were calculated using featureCounts v1.4.6 [38].  
193 Novel miRNAs were searched for using miRDeep2 version 2.0.0.5 [39]. Differential expression of  
194 small RNA was determined by DESeq2 [40], where small RNAs were considered differentially  
195 expressed with an adjusted p-value <0.05 and absolute log<sub>2</sub> fold-change >1. The results of the  
196 DE analysis can be found in **Supplementary Table S6**, and the small RNA-seq data sets can be  
197 found in Gene Expression Omnibus (GEO) with accession number **GSE108385**.

198 *TAp73* (probe no. 475741), *Mcidas* (probe no. 510401-C2), *Hes1* (probe no. 417701), and *Hes5*  
199 (probe no. 400991-C2) were visualized using RNAscope 2.5 HD Duplex Reagent Kit (#322430,  
200 Advanced Cell Diagnostics, *Hayward, CA, USA*) according to manufacturer's instructions.

### 201 **Chromatin immuno-precipitation (ChIP)**

202 Chromatin was harvested from Saos2 cells transiently overexpressing TAp73 $\alpha$ , TAp73 $\beta$ , and the  
203 control vector pcDNA3.1. Saos2 cells were routinely tested negative for Mycoplasma. ChIP and  
204 qPCR was performed as previously described using gene specific primers (sequence information  
205 is provided in **Supplementary Table 4**) [12]. Enrichment levels were determined as the number  
206 of PCR products for each gene relative to total input.

### 207 **Luciferase assay**

208 Luciferase assay was performed as previously described [12]. Briefly, Saos2 cells were  
209 transfected with pcDNA3.1 empty vector, or pcDNA3.1 vector carrying *E2F4* or *MCIDAS*, or both  
210 *E2F4* and *MCIDAS* vectors. Moreover, a firefly luciferase reporter construct containing the putative



211 three wild type E2F-binding sequences of *miR449* genomic region (wild type, or “WT”), or the  
212 same sequences lacking the strongest predicted E2F-binding motif (mutant, or “Mut”) were  
213 transfected (sequence information is provided **Supplementary Table 5**). In addition, a Renilla TK  
214 luciferase vector was co-transfected. At 24 h after transfection, cells were harvested and the  
215 luciferase activities were measured using the dual luciferase assay. Firefly luciferase activities  
216 were determined relative to those of Renilla TK luciferase vector and normalized to the mean  
217 value of samples from the control vector. Luciferase assays were performed as technical triplicates  
218 on every biological replicate.

### 219 **Video microscopy**

220 Murine fallopian tube and testis connected to the epididymis were dissected and transferred to  
221 Dulbecco's Modified Eagle's Medium (DMEM, Gibco, Thermo Fisher Scientific, *Waltham, MA,*  
222 *USA*). To image spermatozoa, the epididymis was separated from testis and vas deferens and an  
223 incision was made at distal end to release the spermatozoa. Spermatozoa as well as the peristaltic  
224 contraction of the fallopian tube were imaged with an inverse microscope.

### 225 **Imaging of cilia-generated bead-flow and cilia beating in the brain ventricular system**

226 Mouse brains were dissected and transferred to DMEM 21063 (Gibco, Thermo Fisher Scientific).  
227 Coronal slices containing the lateral ventricle, ventral third ventricle, aqueduct, and fourth ventricle  
228 were prepared by using a coronal adult brain matrix (ASI Instruments, *Warren, MI, USA*). The  
229 ventral third ventricle was processed further as previously described [41]. Tissue explant was  
230 placed in DMEM containing fluorescent latex beads (Fluoresbrite Multifluorescent 1.0 micron  
231 Microspheres, Polysciences, *Warrington, PA, USA*). Movement of fluorescent beads along the  
232 ventricular wall and within ventricular lumen was observed by fluorescence microscopy using a  
233 DMR (Leica, *Wetzlar, Germany*) upright microscope with an epifluorescence lamp. Ciliary beating  
234 was observed by differential interference contrast microscopy using the same set-up. Bead  
235 movement was recorded using a high-speed camera (Cascade II-512, Photometrics, *Tucson, AZ,*

236 USA) operated by MultiRecorder Software (developed by Johannes Schröder\_Schetlig) and  
237 analyzed using ImageJ software [34].

## 238 **Statistical Analysis**

239 One-tailed, unpaired Student's *t*-test assuming normal distribution and equal variances was used  
240 to calculate statistical significance for pairwise comparisons. Luciferase assay statistics were  
241 assessed using one-way ANOVA assuming normal distribution followed by Dunnett's multiple  
242 comparison tests. The following indications of significance were used: \**P*<0.05, \*\**P*<0.01, \*\*\**P*  
243 <0.001. N values represent biological replicates. Error bars indicate standard error of the mean  
244 (SEM).

245

## 246 **Results**

### 247 **TAp73 is expressed in diverse multiciliated epithelia**

248 We and others previously showed that TAp73 expressed in respiratory epithelia controls  
249 multiciliogenesis [12,13]. However, little is known about the expression and function of TAp73 in  
250 other MCCs. To address this, we performed immunostaining and *in situ* hybridization and  
251 demonstrated that in addition to the testis [42,43], TAp73 is expressed in EDs, FTs, and  
252 ependymal and CP epithelial cells in the brain (**Fig. 1a-f; Supplementary Fig. 1**). qPCR and  
253 western blot analyses showed that, among different multiciliated epithelia, FTs and EDs exhibit  
254 higher levels of TAp73 expression than testis or brain (**Fig. 1g-i**). Taken together, these results  
255 demonstrate robust TAp73 expression in different MCC types.

### 256 **TAp73 is crucial for the molecular circuit of multiciliogenesis in efferent ducts**

257 Loss of *TAp73* leads to male infertility that has been attributed to defective germ cell maintenance  
258 during spermatogenesis [42,43]. Interestingly, we detected spermatozoa in testis from *TAp73* KO  
259 mice, although at a markedly reduced levels (**Supplementary Fig. 2a, b**). Despite normal  
260 morphology and mobility of these cells, no mature spermatozoa were detected in the epididymis  
261 (Epi) of these mice (**Fig. 2a; Supplementary Video 1a-d**), suggesting that additional defects may

262 contribute to infertility. The multiciliated epithelium of the EDs contributes to gamete transport by  
263 facilitating testicular fluid circulation, fluid reabsorption, and spermatozoa concentration  
264 [22,24,25], all essential aspects of male fertility [9,44,45]. Indeed, though no gross morphological  
265 difference was observed in EDs between control and *TAp73* KO animals (**Fig. 2a**),  
266 immunofluorescent staining of the cilia components acetylated alpha-tubulin (Ac- $\alpha$ -TUB) and  
267 dynein axonemal intermediate chain 1 (*DNAI1*) showed a dramatic reduction in the number and  
268 length of cilia in the EDs from *TAp73* KO mice (**Fig. 2b, c**). In contrast to the abundant long cilia  
269 of WT cells, mutant MCCs generated far fewer cilia as observed by transmission electron  
270 microscopy (TEM) (**Fig. 2d; Supplementary Fig. 2c**), resembling the loss of airway cilia in these  
271 animals [12]. Consistent with its role as transcriptional regulator, ChIP followed by qPCR revealed  
272 significant enrichment of *TAp73* in genomic loci of *FOXJ1* [12] and dynein axonemal light  
273 intermediate chain 1 (*DNALI1*) and *DNAI1*, both encoding axonemal dyneins (**Fig. 2e**;  
274 **Supplementary Fig. 3**). Accordingly, expression of *Dnali1*, *Foxj1*, *Rfx2*, and *Rfx3* was reduced or  
275 almost completely lost in male reproductive ducts from *TAp73* KO animals (**Fig. 2f, g**;  
276 **Supplementary Fig. 2d**). Together, our data indicate that *TAp73* directs *Dnali1* and *Dnai1* in  
277 addition to known critical nodes including *Foxj1*, *Rfx2*, and *Rfx3* to mediate multiciliogenesis in  
278 EDs (**Fig. 7a, b**). Thus, these additional defects in the multiciliated epithelium of the EDs may  
279 contribute to male infertility in *TAp73* KO mice.

## 280 **TAp73-driven transcriptional network regulates multiciliogenesis in fallopian tubes**

281 Though infertility in *TAp73* KO females is thought to arise from defects of oocyte development and  
282 release from the ovary [32,46], it remains unclear whether *TAp73* loss affects the multiciliated  
283 epithelium of the FT, thereby possibly influencing ova transport. Despite normal tubal morphology,  
284 analysis of Ac- $\alpha$ -TUB and DNAI1 expression showed reduced cilia coverage of the oviduct  
285 epithelium (**Fig. 3a-c**). Consistently, TEM demonstrated reduced cilia and mislocated basal bodies  
286 in FTs from *TAp73* KO mice (**Fig. 3d; Supplementary Fig. 4a**). Transcript levels of *Dnali1*, *Foxj1*,  
287 and *Rfx2*, but not *Rfx3* were reduced in *TAp73* KO FTs (**Fig. 3e**), which was accompanied by  
288 declined protein expression of FOXJ1, DNAI1, DNALI1 (all expressed in the human FTs,  
289 **Supplementary Fig. 4b**), and gamma-tubulin ( $\gamma$ -TUB, basal body marker) (**Fig. 3f**), though to a  
290 lesser degree when compared to the decrease in multiciliogenesis activity observed in *TAp73*-  
291 deficient EDs. Further, smooth muscle contraction pattern in FTs is similar between control and  
292 *TAp73* KO animals (**Supplementary Video 2a, b**). Taken together, our data indicate that *TAp73*  
293 loss leads to reduced multiciliogenesis in the oviducts (**Fig. 7a, c**).

294

## 295 **Ciliary function in the brain is intact in the absence of TAp73**

296 Given *TAp73* expression in ependymal and CP epithelial cells, we further evaluated *TAp73*  
297 expression during embryonic brain development. Immunofluorescent studies showed that  
298 proliferative progenitors (KI-67<sup>+</sup>) are present in hindbrain roof plate at day E14.5, whereas post-  
299 mitotic cells expressing aquaporin 1 (AQP1) [31,47] are detected in CP epithelium (KI-67/AQP1<sup>+</sup>)  
300 (**Fig. 4a**). Notably, a portion of the roof plate exists between the progenitors and CP epithelium  
301 that remains undifferentiated after cell cycle exit (KI-67/AQP1<sup>-</sup>) (**Fig. 4a**). In contrast to progenitors  
302 with a solitary primary cilium, the “transition” zone is comprised of MCCs that exhibit *TAp73*  
303 expression (**Fig. 4b**).

304 The expression of *TAp73* in ependymal and CP epithelial cells, along with recent studies  
305 demonstrating the role of E2F4/MCIDAS in multiciliogenesis of ependymal cells [7,48,49], led us

306 to examine the role of TAp73 in MCCs in the brain. Immunostainings confirmed the loss of TAp73  
307 expression in ependymal cells and the CP from *TAp73* KO mice (**Fig. 4c**), whereas morphological  
308 analysis revealed no apparent defect in these cells (**Supplementary Fig. 5a**). We performed  
309 immunostainings for the cilia markers ADP-ribosylation factor-like 13b (ARL13B) [50], Ac- $\alpha$ -TUB,  
310 and DNAI1 in the 4<sup>th</sup> and lateral ventricles. In contrast to FTs and EDs, MCCs in ependyma and  
311 CP from *TAp73* KO animals are similar to those of WT mice (**Fig. 4d, e; Supplementary Fig. 5b-**  
312 **d**). No significant difference was observed in the expression of markers for epithelial differentiation  
313 of CP between control and *TAp73* KO animals (**Supplementary Fig. 6a-d**). RT-qPCR analysis  
314 demonstrated similar expression levels of *Dnali1* and *Foxj1*, whereas increased *Rfx2* and *Rfx3*  
315 mRNA levels were observed in brain ventricles from *TAp73* KO mice (**Fig. 4f**). Consistently, ciliary  
316 beating and bead flow in the cerebrospinal fluid appeared unaffected by *TAp73* loss (**Fig. 4g;**  
317 **Supplementary Video 3a, b**). Taken together, these results indicate that, unlike EDs, FTs, and  
318 the airways [12], the differentiation and function of MCCs in the brain remain intact despite *TAp73*  
319 loss.

### 320

### 321 **TAp73 regulates *miR-34/449* family members in diverse MCCs**

322 Functional MCCs in the brain from *TAp73* KO mice suggest that other ciliogenic factors may  
323 rescue brain multiciliogenesis in the absence of *TAp73*. *TAp73* influences post-transcriptional  
324 mechanisms *via* regulation of miRNAs [12]. Analysis of small RNA species from brain ventricles  
325 in *TAp73* KO mice revealed reduced *miR34bc* levels, along with a strong induction of the *miR449*  
326 cluster that works together with *miR34bc* to regulate multiciliogenesis in different tissues across  
327 species (**Fig. 5a, c; Supplementary Table 6**) [11,33,51–53]. In the brain, *miR449* is  
328 predominantly detected in the CP [54], where its expression undergoes >10 fold increase upon  
329 *TAp73* loss, whereas *miR34bc* levels strongly decline (**Fig. 5b, c**). Although *miR34b* levels were  
330 down-regulated as well in trachea from *TAp73* KO (**Supplementary Fig. 7a**), *miR449* induction  
331 was less pronounced and more variable in FTs and EDs (**Fig. 5d**). Altogether, these results reveal

332 a conserved reaction from the *miR-34/449* family following *TAp73* loss in diverse multiciliated  
333 epithelia.

334 In an effort to understand *miR449* upregulation we analyzed potential changes in the RB-E2F  
335 pathway known to regulate *miR449* levels [55,56]. However, expression of *E2f1*, *E2f3*, *Cdkn1a*,  
336 and *Cdkn1b* in brain ventricles were comparable between WT and mutant animals,  
337 (**Supplementary Fig. 8a, b**), indicative of a RB-E2F pathway unaffected by *TAp73* loss in brain  
338 MCCs. Interestingly, transcript and protein levels of the other E2F family member E2F4, which is  
339 a potent inducer of multiciliogenesis [6–8,48,57,58], were markedly increased in *TAp73* KO  
340 ventricles, despite only a mild increase of its cofactor *Mcidas* (**Fig. 5e, f**). In contrast, E2F4 levels  
341 in FTs and EDs were unaltered and even downregulated in tracheae (**Supplementary Fig. 7b-e**).  
342 Therefore, increased E2F4 levels concurrent with a *miR449* increase are restricted to the brain in  
343 *TAp73* KO mice.

344 To assess potential E2F4 contribution to *miR449* elevation, we used the genomic region of  
345 *miR449* containing three putative E2F binding sites in a reporter-based assay. Indeed, E2F4 in  
346 combination with MCIDAS elicited a strong transcriptional response from the *miR449* locus, a  
347 reaction almost abolished by mutating the strongest out of three E2F consensus motifs (**Fig. 5g**;  
348 **Supplementary Table 5**). Together, these results indicate that increased E2F4/MCIDAS activity  
349 may stimulate *miR449* expression in *TAp73* KO brains.

350

### 351 **TAp73 collaborates with *miR449* in brain multiciliogenesis**

352 Our data suggest that *miR449* upregulation may compensate at least partially for *TAp73* loss to  
353 maintain brain multiciliogenesis. To address this, we generated mice with a deletion of the *miR449*  
354 cluster in addition to *TAp73*. Strikingly, *TAp73<sup>-/-</sup>;miR449<sup>-/-</sup>* (*TAp73xmiR449* KO) mice developed  
355 severe hydrocephalus (**Fig. 6a; Supplementary Fig. 9a**). Since defective ependymal and CP cilia  
356 contribute to the development of hydrocephalus [59–61], we next assessed ciliation in the  
357 ventricles of *TAp73xmiR449* KO mice. Analysis of the expression of ARL13B in CP epithelium

358 revealed a decrease in cilia number and length in the absence of *miR449*, whereas a more  
359 pronounced reduction in cilia was observed in *TAp73xmiR449* KO mice (**Fig. 6b, c;**  
360 **Supplementary Fig. 9b**). TEM studies also revealed mildly disorganized apical docking of basal  
361 bodies in ependymal cells in *TAp73* KO and *TAp73xmiR449* KO mice (**Fig. 6d; Supplementary**  
362 **Fig. 9c**); however, Ac- $\alpha$ -TUB content was similar in ependymal cells among WT and  
363 *TAp73xmiR449* KO animals (**Supplementary Fig. 9d**). Consistently, ciliary beating and bead flow  
364 over ventricles appeared unaffected in *TAp73xmiR449* KO animals (**Supplementary Fig. 9e;**  
365 **Supplementary Video 3a, c**). Furthermore, expression of cytokeratins, AQP1, and OTX2 in CP  
366 epithelial cells was similar among WT, *miR449* KO, and *TAp73xmiR449* KO animals  
367 (**Supplementary Fig. 10a-c**). Despite the role of Notch signaling in CP development and  
368 tumorigenesis [31,62], RNAscope studies revealed similar expression of NOTCH targets *Hes1*  
369 and *Hes5* in the roof plate of WT, *miR449* KO, and *TAp73xmiR449* KO embryos at day E14.5  
370 (**Supplementary Fig. 11**). In summary, additional loss of *miR449* in *TAp73* KO mice strongly  
371 impairs ciliogenesis in the CP, but only slightly affects ependymal cilia, which is consistent with its  
372 prominent expression in the CP [54] (**Fig. 5b**). Thus, our data indicate that *miR449* collaborates  
373 with *TAp73* to drive multiciliogenesis in the brain.

374 As *miR449* was induced upon *TAp73* deletion in further multiciliated tissues, we analyzed tracheae  
375 and EDs in *TAp73xmiR449* KO mice. Immunostainings and TEM consistently revealed a dramatic  
376 decrease in cilia coverage and an increase in defective basal body docking in trachea from  
377 *TAp73xmiR449* KO animals compared to WT animals (**Fig. 6e-g; Supplementary Fig. 12a**), a  
378 phenotype bearing resemblance to our previous findings in the airways of *TAp73* KO animals [12].  
379 Likewise, loss of *miR449* did not further enhance MCC reduction in *TAp73*-deficient EDs  
380 (**Supplementary Fig. 12b, c**). Thus, additional deletion of the *miR449* cluster fails to exacerbate  
381 ciliary defects in trachea and EDs in the absence of *TAp73*.

382 Overall, our data indicate that TAp73 utilizes the unique topology of its transcriptional circuit to  
383 communicate with the *miR-34/449* family and other crucial regulators of motile multiciliogenesis  
384 e.g. *E2F4/MCIDAS* to regulate brain multiciliogenesis (**Fig. 7a, d, e**).

385

## 386 **Discussion**

387 TAp73 activates a plethora of ciliogenic effectors to drive multiciliogenesis in the airways [12,13].  
388 The current study examines the role of TAp73-driven molecular circuit in MCCs of reproductive  
389 tracts and the brain. Our results revealed a profound reduction of cilia in EDs and FTs from *TAp73*-  
390 deficient mice, as well as diminished *Foxj1*, *Rfx2*, and *Rfx3* expression. These molecular and  
391 cellular changes in MCCs are reminiscent of our previous findings in respiratory epithelia of these  
392 mice, suggesting that male and female infertility associated with *TAp73* loss could be in part  
393 related to the observed cilia loss. The expression of the axonemal dyneins *Dnai1* and *Dnali1*, both  
394 of which exhibit TAp73 binding in their genomic loci, was also significantly reduced in EDs and  
395 FTs from mutant animals, indicating that they are part of the TAp73-directed multiciliogenesis  
396 program in reproductive tracts.

397 Consistent with previous reports, we found partial degradation of the germinal epithelium and  
398 reduced sperm cell production in *TAp73*KO mice [42,43]. The EDs are comprised of MCCs, which  
399 are required for fluid circulation and reabsorption, thereby facilitating the transport of spermatozoa  
400 to their storage and maturation in the epididymis [22,24,25]. Despite the presence of flagellated  
401 spermatozoa in testis, lack of spermatozoa in epididymis of *TAp73* KO mice indicates that  
402 defective multiciliogenesis may contribute to male sterility. Indeed, disruption of transcriptional  
403 regulators of multiciliogenesis has been shown to cause infertility in mice and humans [3,63],  
404 whereas fertility issues have been reported in female primary ciliary dyskinesia patients [20,21].  
405 Importantly, *TAp73* is downregulated as women age [64], and certain single nucleotide  
406 polymorphisms in *TP73* are associated with female patients over 35 years of age seeking *in vitro*  
407 fertilization [65,66]. Hence, the integrity of MCCs is critical for reproductive health. Further studies



408 using tissue-specific deletion of *TAp73* in MCCs of EDs and oviducts are necessary to delineate  
409 its role in reproductive motile cilia maintenance and fertility.

410 In the brain, *TAp73* expression is initiated at the onset of multiciliated differentiation of ependymal  
411 and CP epithelial cells. However, our data indicate that *TAp73* is dispensable for the generation  
412 of cilia in the brain, although it is plausible that *TAp73* loss results in more subtle defects such as  
413 polarity and cilia orientation [67,68]. In contrast to the dynamic *TAp73*-dependent program in the  
414 airways and reproductive tracts, expression of *Foxj1*, *Rfx2*, and *Rfx3* in the brain remains mostly  
415 unaltered in the absence of *TAp73*, suggesting that other effectors maintain the activity of the  
416 molecular circuit to support MCC differentiation.

417 Previous studies revealed robust expression of *GemC1* and *E2f/Mcidas*, all of which are capable  
418 of transcriptional activation of *Foxj1*, *TAp73* itself, and many other ciliogenic effectors e.g. *Rfx2*  
419 and *Rfx3* in MCCs of the brain [4,6,8,48,69]. Indeed, E2F4/MCIDAS expression is upregulated in  
420 the brain but not in other multiciliated tissues upon *TAp73* loss, and therefore may facilitate brain  
421 multiciliogenesis. In agreement, loss of either *Mcidas* or *GemC1*, both transcriptional activators of  
422 *TAp73*, leads to defect in MCC differentiation and hydrocephalus [3,6].

423 Although it is less clear how *TAp73* loss results in enhanced E2F/MCIDAS activity in the brain, a  
424 quick look downstream of *TAp73* provides some clues: reduced expression of the *TAp73* target  
425 *miR34bc* is concurrent with an induction of *miR449* in the absence of *TAp73*. Interestingly,  
426 expression of *Cdkn1a/p21*, *Cdkn1b/p27*, *E2f1*, and *E2f3* in brain ventricles remain unchanged  
427 following *TAp73* loss, suggesting that *TAp73* loss regulates E2F and *miR449* activity  
428 independently of the conserved RB-E2F1 axis. *miR449* induction is commonly observed in *miR34*-  
429 deficient MCCs, whereas ablation of the entire *miR-34/449* family severely impairs  
430 multiciliogenesis in diverse tissues [33,70]. *miR449* is known to inhibit the NOTCH pathway to  
431 relieve the suppression of MCC fate determination; however, NOTCH pathway activity in the CP  
432 remains unchanged after *miR449* loss. Given the diverse targets of the *miR-34/449* family, it is  
433 plausible that *miR449* may indirectly increase E2F/MCIDAS activity in MCCs of the brain

434 independent of NOTCH inhibition. Conversely, transcriptional activation of *miR449* by  
435 E2F/MCIDAS complexes may complete the feedback loop to keep the molecular circuit fully  
436 engaged in the absence of *TAp73*.

437 This interpretation posits that the crosstalk between *miR449* and E2F/MCIDAS serves as a crucial  
438 backup circuit for *TAp73*-driven multiciliogenesis network in the brain. Indeed, combined deletion  
439 of *TAp73* and *miR449* results in disruption of multiciliogenesis in the brain and hydrocephalus,  
440 defects distinct from those associated with complete loss of the *miR-34/449* family [33,71]. In  
441 *TAp73*-deficient MCCs outside the brain that exhibit less prominent increase in *miR449* and no  
442 increase in E2F4 levels, further deletion of *miR449* cluster fails to exacerbate multiciliogenesis  
443 defects caused by *TAp73* loss, indicating that *TAp73* functions at least partially through *miR449*  
444 to support MCCs in the brain. Recent studies also demonstrated the role of *TAp73*-driven *miR34a*  
445 expression in neuronal development [72]. Therefore, interaction of *TAp73* with *miR-34/449* family  
446 members is crucial for normal brain functions.

447 Nonetheless, detailed studies are necessary to clarify the interaction between *miR449* and  
448 E2F4/MCIDAS pathway in MCCs in the brain, but also to address *miR449* regulation in *TAp73*-  
449 deficient MCCs outside the brain.

450 Unlike *TAp73* mutant animals, *p73* KO mice lacking both *TAp73* and  $\Delta Np73$  exhibit  
451 hydrocephalus, defective ependymal cell maturation and aqueduct stenosis, suggesting a  
452 potential role for  $\Delta Np73$  in ependymal cells [73,74]. Given the abnormal apical localization of basal  
453 bodies in ependymal cells along with ciliary defects in the CP from *TAp73xmiR449* KO mice, it is  
454 conceivable that  $\Delta Np73$  may regulate *miR449* expression indirectly in these cells. In support of  
455 this notion, *miR449* is highly expressed in the CP whereby its loss alone leads to ciliary defects,  
456 whereas  $\Delta Np73$  deletion also results in defects in the CP [75]. Further analysis of the  
457 multiciliogenesis network and *miR449* expression in MCCs in the brains of *p73* KO and  $\Delta Np73$   
458 KO animals are necessary to resolve these questions.

459 **Acknowledgments**

460 We thank Tak Mak for providing *TAp73* KO mice, Gerd Hasenfuß for support, Matthias  
461 Dobbelstein for hosting and Karola Metze and Verena Siol for assistance. M.L. is supported by  
462 Deutsche Forschungsgemeinschaft (DFG Li 2405); H.Z. by New York Institute of Technology,  
463 Sanford Research, Matthew Larson Foundation, Institutional Development Award from the  
464 National Institute of General Medical Sciences under grant numbers 5P20GM103548,  
465 1P20GM103620-01A1, and National Cancer Institute (R01CA220551); F.B. by Wilhelm-Sander-  
466 Stiftung (2016.041.1); A.K.G by the Max Planck Society. We thank Heymut Omran's group for  
467 introduction to cilia microscopy and Travis Stracker for disclosure of non-published data.

468

469 **Author Contributions**

470 Me.W. and T.E. characterized cilia defects and gene expression and generated figures. Me.W.  
471 and Ma.W. validated *TAp73* targets by WB and ChIP. E.E. and F.B. contributed IF analysis of  
472 human epididymis. E.E. performed cilia quantification on tracheae. D.R. performed electron  
473 microscopy analysis. C.W. maintained mice, performed RNA isolation and qPCRs. L.V-H. and  
474 S.B. contributed to Western blot analysis of different tissues. Z. H. performed RNAscope analysis  
475 for *TAp73* on diverse tissues. K.B.G., J.Z., L.L., and H.Z. contributed brain analyses. A-K.G  
476 analyzed *ex vivo* ciliary beating. O.S. analyzed small RNA sequencing data. S.A. contributed to  
477 interpretation and supported the group. M.L. developed the project, interpreted the data, designed  
478 and coordinated the experiments to complete this study. Me.W., T.E., H.Z., and M.L. were major  
479 contributors to manuscript preparation.

480

481 **Conflict of Interest**

482 The authors declare that they have no conflict of interest.

483 **Electronic supplementary material.** The online version of this article contains supplementary  
484 material, which is available to authorized users.

485 **References**

- 486 1. Spassky N, Meunier A. The development and functions of multiciliated epithelia. *Nat. Rev.*  
487 *Mol. Cell Biol.* 2017;18:423–36.
- 488 2. Choksi SP, Lauter G, Swoboda P, Roy S. Switching on cilia: transcriptional networks  
489 regulating ciliogenesis. *Dev. Camb. Engl.* 2014;141:1427–41.
- 490 3. Terré B, Piergiovanni G, Segura-Bayona S, Gil-Gómez G, Youssef SA, Attolini CS-O, et al.  
491 GEMC1 is a critical regulator of multiciliated cell differentiation. *EMBO J.* 2016;35:942–60.
- 492 4. Arbi M, Pefani D-E, Kyrousi C, Lalioti M-E, Kalogeropoulou A, Papanastasiou AD, et al.  
493 GemC1 controls multiciliogenesis in the airway epithelium. *EMBO Rep.* 2016;17:400–13.
- 494 5. Zhou F, Narasimhan V, Shboul M, Chong YL, Reversade B, Roy S. Gmnc Is a Master  
495 Regulator of the Multiciliated Cell Differentiation Program. *Curr. Biol.* 2015;25:3267–73.
- 496 6. Boon M, Wallmeier J, Ma L, Loges NT, Jaspers M, Olbrich H, et al. MCIDAS mutations  
497 result in a mucociliary clearance disorder with reduced generation of multiple motile cilia.  
498 *Nat. Commun.* 2014;5:4418.
- 499 7. Ma L, Quigley I, Omran H, Kintner C. Multicilin drives centriole biogenesis via E2f proteins.  
500 *Genes Dev.* 2014;28:1461–71.
- 501 8. Stubbs JL, Vladar EK, Axelrod JD, Kintner C. Multicilin promotes centriole assembly and  
502 ciliogenesis during multiciliate cell differentiation. *Nat. Cell Biol.* 2012;14:140–7.
- 503 9. Danielian PS, Hess RA, Lees JA. E2f4 and E2f5 are essential for the development of the  
504 male reproductive system. *Cell Cycle Georget. Tex* 2016;15:250–60.
- 505 10. Danielian PS, Bender Kim CF, Caron AM, Vasile E, Bronson RT, Lees JA. E2f4 is required  
506 for normal development of the airway epithelium. *Dev. Biol.* 2007;305:564–76.
- 507 11. Marcet B, Chevalier B, Luxardi G, Coraux C, Zaragosi L-E, Cibois M, et al. Control of  
508 vertebrate multiciliogenesis by miR-449 through direct repression of the Delta/Notch  
509 pathway. *Nat. Cell Biol.* 2011;13:693–9.
- 510 12. Nemaierova A, Kramer D, Siller SS, Herr C, Shomroni O, Pena T, et al. TAp73 is a central  
511 transcriptional regulator of airway multiciliogenesis. *Genes Dev.* 2016;30:1300–12.
- 512 13. Marshall CB, Mays DJ, Beeler JS, Rosenbluth JM, Boyd KL, Santos Guasch GL, et al. p73  
513 Is Required for Multiciliogenesis and Regulates the Foxj1-Associated Gene Network. *Cell*  
514 *Rep.* 2016;14:2289–300.
- 515 14. Blatt EN, Yan XH, Wuerffel MK, Hamilos DL, Brody SL. Forkhead transcription factor HFH-  
516 4 expression is temporally related to ciliogenesis. *Am. J. Respir. Cell Mol. Biol.*  
517 1999;21:168–76.
- 518 15. Brody SL, Yan XH, Wuerffel MK, Song SK, Shapiro SD. Ciliogenesis and left-right axis  
519 defects in forkhead factor HFH-4-null mice. *Am. J. Respir. Cell Mol. Biol.* 2000;23:45–51.

- 520 16. Chen J, Knowles HJ, Hebert JL, Hackett BP. Mutation of the mouse hepatocyte nuclear  
521 factor/forkhead homologue 4 gene results in an absence of cilia and random left-right  
522 asymmetry. *J. Clin. Invest.* 1998;102:1077–82.
- 523 17. Yu X, Ng CP, Habacher H, Roy S. Foxj1 transcription factors are master regulators of the  
524 motile ciliogenic program. *Nat. Genet.* 2008;40:1445–53.
- 525 18. Crow J, Amso NN, Lewin J, Shaw RW. Morphology and ultrastructure of fallopian tube  
526 epithelium at different stages of the menstrual cycle and menopause. *Hum. Reprod. Oxf.*  
527 *Engl.* 1994;9:2224–33.
- 528 19. Lyons RA, Saridogan E, Djahanbakhch O. The reproductive significance of human  
529 Fallopian tube cilia. *Hum. Reprod. Update* 2006;12:363–72.
- 530 20. Raidt J, Werner C, Menchen T, Dougherty GW, Olbrich H, Loges NT, et al. Ciliary function  
531 and motor protein composition of human fallopian tubes. *Hum. Reprod. Oxf. Engl.*  
532 2015;30:2871–80.
- 533 21. Vanaken GJ, Bassinet L, Boon M, Mani R, Honoré I, Papon J-F, et al. Infertility in an adult  
534 cohort with primary ciliary dyskinesia: phenotype–gene association. *Eur. Respir. J.*  
535 2017;50:1700314.
- 536 22. Ilio KY, Hess RA. Structure and function of the ductuli efferentes: a review. *Microsc. Res.*  
537 *Tech.* 1994;29:432–67.
- 538 23. Lambot M-AH, Mendive F, Laurent P, Van Schoore G, Noël J-C, Vanderhaeghen P, et al.  
539 Three-dimensional reconstruction of efferent ducts in wild-type and *Lgr4* knock-out mice.  
540 *Anat. Rec. Hoboken NJ* 2007 2009;292:595–603.
- 541 24. Hess RA. The Efferent Ductules: Structure and Functions [Internet]. In: Robaire B, Hinton  
542 BT, editors. *The Epididymis: From Molecules to Clinical Practice*. Boston, MA: Springer US;  
543 2002 [cited 2017 Jan 19]. page 49–80. Available from: [http://link.springer.com/10.1007/978-](http://link.springer.com/10.1007/978-1-4615-0679-9_4)  
544 [1-4615-0679-9\\_4](http://link.springer.com/10.1007/978-1-4615-0679-9_4)
- 545 25. Hess RA. Small tubules, surprising discoveries: from efferent ductules in the turkey to the  
546 discovery that estrogen receptor alpha is essential for fertility in the male. *Anim. Reprod.*  
547 2015;12:7–23.
- 548 26. Lun MP, Johnson MB, Broadbelt KG, Watanabe M, Kang Y -j., Chau KF, et al. Spatially  
549 Heterogeneous Choroid Plexus Transcriptomes Encode Positional Identity and Contribute  
550 to Regional CSF Production. *J. Neurosci.* 2015;35:4903–16.
- 551 27. Silva-Vargas V, Maldonado-Soto A, Mizrak D, Codega P, Doetsch F. Age-Dependent  
552 Niche Signals from the Choroid Plexus Regulate Adult Neural Stem Cells. *Cell Stem Cell*  
553 2016;19:643–52.
- 554 28. Spassky N, Merkle FT, Flames N, Tramontin AD, García-Verdugo JM, Alvarez-Buylla A.  
555 Adult ependymal cells are postmitotic and are derived from radial glial cells during  
556 embryogenesis. *J. Neurosci. Off. J. Soc. Neurosci.* 2005;25:10–8.
- 557 29. Lun MP, Monuki ES, Lehtinen MK. Development and functions of the choroid plexus-  
558 cerebrospinal fluid system. *Nat. Rev. Neurosci.* 2015;16:445–57.

- 559 30. Del Bigio MR. Ependymal cells: biology and pathology. *Acta Neuropathol. (Berl.)*  
560 2010;119:55–73.
- 561 31. Li L, Grausam KB, Wang J, Lun MP, Ohli J, Lidov HGW, et al. Sonic Hedgehog promotes  
562 proliferation of Notch-dependent monociliated choroid plexus tumour cells. *Nat. Cell Biol.*  
563 2016;18:418–30.
- 564 32. Tomasini R, Tsuchihara K, Wilhelm M, Fujitani M, Rufini A, Cheung CC, et al. TAp73  
565 knockout shows genomic instability with infertility and tumor suppressor functions. *Genes*  
566 *Dev.* 2008;22:2677–91.
- 567 33. Song R, Walentek P, Sponer N, Klimke A, Lee JS, Dixon G, et al. miR-34/449 miRNAs are  
568 required for motile ciliogenesis by repressing cp110. *Nature* 2014;510:115–20.
- 569 34. Schindelin J, Arganda-Carreras I, Frise E, Kaynig V, Longair M, Pietzsch T, et al. Fiji: an  
570 open-source platform for biological-image analysis. *Nat. Methods* 2012;9:676–82.
- 571 35. Capece V, Garcia Vizcaino JC, Vidal R, Rahman R-U, Pena Centeno T, Shomroni O, et al.  
572 Oasis: online analysis of small RNA deep sequencing data. *Bioinformatics* 2015;31:2205–  
573 7.
- 574 36. Martin M. Cutadapt removes adapter sequences from high-throughput sequencing reads.  
575 *EMBnet.journal* 2011;17:10.
- 576 37. Dobin A, Davis CA, Schlesinger F, Drenkow J, Zaleski C, Jha S, et al. STAR: ultrafast  
577 universal RNA-seq aligner. *Bioinforma. Oxf. Engl.* 2013;29:15–21.
- 578 38. Liao Y, Smyth GK, Shi W. featureCounts: an efficient general purpose program for  
579 assigning sequence reads to genomic features. *Bioinforma. Oxf. Engl.* 2014;30:923–30.
- 580 39. Friedländer MR, Mackowiak SD, Li N, Chen W, Rajewsky N. miRDeep2 accurately  
581 identifies known and hundreds of novel microRNA genes in seven animal clades. *Nucleic*  
582 *Acids Res.* 2012;40:37–52.
- 583 40. Love MI, Huber W, Anders S. Moderated estimation of fold change and dispersion for RNA-  
584 seq data with DESeq2. *Genome Biol.* 2014;15:550.
- 585 41. Faubel R, Westendorf C, Bodenschatz E, Eichele G. Cilia-based flow network in the brain  
586 ventricles. *Science* 2016;353:176–8.
- 587 42. Holembowski L, Kramer D, Riedel D, Sordella R, Nemajerova A, Dobbstein M, et al.  
588 TAp73 is essential for germ cell adhesion and maturation in testis. *J. Cell Biol.*  
589 2014;204:1173–90.
- 590 43. Inoue S, Tomasini R, Rufini A, Elia AJ, Agostini M, Amelio I, et al. TAp73 is required for  
591 spermatogenesis and the maintenance of male fertility. *Proc. Natl. Acad. Sci.*  
592 2014;111:1843–8.
- 593 44. Dacheux J-L, Dacheux F. New insights into epididymal function in relation to sperm  
594 maturation. *Reproduction* 2013;147:R27–42.

- 595 45. Mendive F, Laurent P, Van Schoore G, Skarnes W, Pochet R, Vassart G. Defective  
596 postnatal development of the male reproductive tract in LGR4 knockout mice. *Dev. Biol.*  
597 2006;290:421–34.
- 598 46. Santos Guasch GL, Beeler JS, Marshall CB, Shaver TM, Sheng Q, Johnson KN, et al. p73  
599 Is Required for Ovarian Follicle Development and Regulates a Gene Network Involved in  
600 Cell-to-Cell Adhesion. *iScience* 2018;8:236–49.
- 601 47. Huang X, Ketova T, Fleming JT, Wang H, Dey SK, Litingtung Y, et al. Sonic hedgehog  
602 signaling regulates a novel epithelial progenitor domain of the hindbrain choroid plexus.  
603 *Dev. Camb. Engl.* 2009;136:2535–43.
- 604 48. Kyrousi C, Lalioti M-E, Skavatsou E, Lygerou Z, Taraviras S. Mcidas and GemC1/Lynkeas  
605 specify embryonic radial glial cells. *Neurogenesis* 2016;3:e1172747.
- 606 49. Mori M, Hazan R, Danielian PS, Mahoney JE, Li H, Lu J, et al. Cytoplasmic E2f4 forms  
607 organizing centres for initiation of centriole amplification during multiciliogenesis. *Nat.*  
608 *Commun.* 2017;8:15857.
- 609 50. Caspary T, Larkins CE, Anderson KV. The Graded Response to Sonic Hedgehog Depends  
610 on Cilia Architecture. *Dev. Cell* 2007;12:767–78.
- 611 51. Lizé M, Herr C, Klimke A, Bals R, Dobbstein M. MicroRNA-449a levels increase by  
612 several orders of magnitude during mucociliary differentiation of airway epithelia. *Cell Cycle*  
613 *Georget. Tex* 2010;9:4579–83.
- 614 52. Marcet B, Chevalier B, Coraux C, Kodjabachian L, Barbry P. MicroRNA-based silencing of  
615 Delta/Notch signaling promotes multiple cilia formation. *Cell Cycle* 2011;10:2858–64.
- 616 53. Otto T, Candido SV, Pilarz MS, Sicinska E, Bronson RT, Bowden M, et al. Cell cycle-  
617 targeting microRNAs promote differentiation by enforcing cell-cycle exit. *Proc. Natl. Acad.*  
618 *Sci. U. S. A.* 2017;114:10660–5.
- 619 54. Redshaw N, Wheeler G, Hajhosseini MK, Dalmay T. microRNA-449 is a putative regulator  
620 of choroid plexus development and function. *Brain Res.* 2009;1250:20–6.
- 621 55. Yang X, Feng M, Jiang X, Wu Z, Li Z, Aau M, et al. miR-449a and miR-449b are direct  
622 transcriptional targets of E2F1 and negatively regulate pRb-E2F1 activity through a  
623 feedback loop by targeting CDK6 and CDC25A. *Genes Dev.* 2009;23:2388–93.
- 624 56. Lizé M, Pilarski S, Dobbstein M. E2F1-inducible microRNA 449a/b suppresses cell  
625 proliferation and promotes apoptosis. *Cell Death Differ.* 2010;17:452–8.
- 626 57. Kyrousi C, Arbi M, Pilz G-A, Pefani D-E, Lalioti M-E, Ninkovic J, et al. Mcidas and GemC1  
627 are key regulators for the generation of multiciliated ependymal cells in the adult  
628 neurogenic niche. *Development* 2015;142:3661–74.
- 629 58. Kim S, Ma L, Shokhirev MN, Quigley I, Kintner C. Multicilin and activated E2f4 induce  
630 multiciliated cell differentiation in primary fibroblasts. *Sci. Rep.* 2018;8:12369.



- 631 59. Ibanez-Tallon I. Dysfunction of axonemal dynein heavy chain Mdnah5 inhibits ependymal  
632 flow and reveals a novel mechanism for hydrocephalus formation. *Hum. Mol. Genet.*  
633 2004;13:2133–41.
- 634 60. Banizs B, Pike MM, Millican CL, Ferguson WB, Komlosi P, Sheetz J, et al. Dysfunctional  
635 cilia lead to altered ependyma and choroid plexus function, and result in the formation of  
636 hydrocephalus. *Dev. Camb. Engl.* 2005;132:5329–39.
- 637 61. Banizs B, Komlosi P, Bevenssee MO, Schwiebert EM, Bell PD, Yoder BK. Altered pH(i)  
638 regulation and Na(+)/HCO3(-) transporter activity in choroid plexus of cilia-defective  
639 Tg737(orpk) mutant mouse. *Am. J. Physiol. Cell Physiol.* 2007;292:C1409-1416.
- 640 62. Bill BR, Balciunas D, McCarra JA, Young ED, Xiong T, Spahn AM, et al. Development and  
641 Notch Signaling Requirements of the Zebrafish Choroid Plexus. *PLoS ONE* 2008;3:e3114.
- 642 63. Amirav I, Wallmeier J, Loges NT, Menchen T, Pennekamp P, Mussaffi H, et al. Systematic  
643 Analysis of CCNO Variants in a Defined Population: Implications for Clinical Phenotype and  
644 Differential Diagnosis. *Hum. Mutat.* 2016;37:396–405.
- 645 64. Guglielmino MR, Santonocito M, Vento M, Ragusa M, Barbagallo D, Borzì P, et al. TAp73  
646 is downregulated in oocytes from women of advanced reproductive age. *Cell Cycle*  
647 *Georget. Tex* 2011;10:3253–6.
- 648 65. Hu W, Zheng T, Wang J. Regulation of Fertility by the p53 Family Members. *Genes Cancer*  
649 2011;2:420–30.
- 650 66. Feng Z, Zhang C, Kang H-J, Sun Y, Wang H, Naqvi A, et al. Regulation of female  
651 reproduction by p53 and its family members. *FASEB J. Off. Publ. Fed. Am. Soc. Exp. Biol.*  
652 2011;25:2245–55.
- 653 67. Fujitani M, Sato R, Yamashita T. Loss of p73 in ependymal cells during the perinatal period  
654 leads to aqueductal stenosis. *Sci. Rep.* 2017;7:12007.
- 655 68. Gonzalez-Cano L, Fuertes-Alvarez S, Robledinos-Anton N, Bizy A, Villena-Cortes A,  
656 Fariñas I, et al. p73 is required for ependymal cell maturation and neurogenic SVZ  
657 cytoarchitecture. *Dev. Neurobiol.* 2016;76:730–47.
- 658 69. Pefani D-E, Dimaki M, Spella M, Karantzelis N, Mitsiki E, Kyrousi C, et al. Idas, a Novel  
659 Phylogenetically Conserved Geminin-related Protein, Binds to Geminin and Is Required for  
660 Cell Cycle Progression. *J. Biol. Chem.* 2011;286:23234–46.
- 661 70. Bao J, Li D, Wang L, Wu J, Hu Y, Wang Z, et al. MicroRNA-449 and MicroRNA-34b/c  
662 Function Redundantly in Murine Testes by Targeting E2F Transcription Factor-  
663 Retinoblastoma Protein (E2F-pRb) Pathway. *J. Biol. Chem.* 2012;287:21686–98.
- 664 71. Fededa JP, Esk C, Mierzwa B, Stanyte R, Yuan S, Zheng H, et al. MicroRNA-34/449  
665 controls mitotic spindle orientation during mammalian cortex development. *EMBO J.*  
666 2016;35:2386–98.
- 667 72. Agostini M, Tucci P, Killick R, Candi E, Sayan BS, Rivetti di Val Cervo P, et al. Neuronal  
668 differentiation by TAp73 is mediated by microRNA-34a regulation of synaptic protein  
669 targets. *Proc. Natl. Acad. Sci. U. S. A.* 2011;108:21093–8.

- 670 73. Medina-Bolívar C, González-Arnay E, Talos F, González-Gómez M, Moll UM, Meyer G.  
671 Cortical hypoplasia and ventriculomegaly of p73-deficient mice: Developmental and adult  
672 analysis: p73 in developing and adult cortex. *J. Comp. Neurol.* 2014;522:2663–79.
- 673 74. Yang A, Walker N, Bronson R, Kaghad M, Oosterwegel M, Bonnin J, et al. p73-deficient  
674 mice have neurological, pheromonal and inflammatory defects but lack spontaneous  
675 tumours. *Nature* 2000;404:99–103.
- 676 75. Tissir F, Ravni A, Achouri Y, Riethmacher D, Meyer G, Goffinet AM. DeltaNp73 regulates  
677 neuronal survival in vivo. *Proc. Natl. Acad. Sci. U. S. A.* 2009;106:16871–6.
- 678 76. Koepfel M, van Heeringen SJ, Kramer D, Smeenk L, Janssen-Megens E, Hartmann M, et  
679 al. Crosstalk between c-Jun and TAp73alpha/beta contributes to the apoptosis-survival  
680 balance. *Nucleic Acids Res.* 2011;39:6069–85.
- 681 77. Diez-Roux G, Banfi S, Sultan M, Geffers L, Anand S, Rozado D, et al. A High-Resolution  
682 Anatomical Atlas of the Transcriptome in the Mouse Embryo. *PLoS Biol.* 2011;9:e1000582.

683 **Figure Legends**

684 **Fig. 1. TAp73 is expressed in diverse multiciliated epithelia.** (a) Schematic illustration of  
685 efferent ducts (EDs, red arrows) that connect testis and epididymis (Epi). Blue dotted lines indicate  
686 regions used for histological, protein, and RNA analyses. (b) Representative images of the  
687 expression of P73 (green) and the axonemal marker acetylated-alpha tubulin (Ac- $\alpha$ -TUB, red) in  
688 the human ED. White bracket circles delineate P73 nuclear staining. DAPI staining (blue) marks  
689 nuclei. (c) Schematic illustration of the fallopian tube (FT) that connects ovary and uterus. Blue  
690 dotted line illustrates the region used for immunofluorescence analysis including fimbriae (red  
691 arrow). (d) Expression of P73 in human FT. Upper panel depicts a magnification of the boxed  
692 region in the lower panel. Arrowheads mark P73<sup>+</sup> cells. Images were retrieved from Human Protein  
693 Atlas (<https://www.proteinatlas.org/ENSG00000078900-TP73/tissue/fallopian+tube>). (e)  
694 Schematic illustration of murine brain ventricles (red arrows). Blue dotted lines indicate the position  
695 of coronal brain slices used in protein and RNA analyses. (f) Expression of TAp73 in lateral and  
696 4<sup>th</sup> ventricles of wild type (WT) adult mice. Red dotted lines demarcate ependymal cells lining brain  
697 ventricles. Notice that both ependymal and choroid plexus (CP) epithelial cells express TAp73. (g)  
698 Quantitative PCR analysis of *TAp73* expression in the testis, EDs, FTs, and brain ventricles from  
699 WT adult mice. Expression levels are shown in copy number. Data from a single experiment are  
700 shown (testis,  $n=3$ ; FT and ventricle,  $n=4$ ; ED,  $n=6$ ). (h) Western blot analysis of the expression  
701 of TAp73 and  $\Delta$ Np73 in testis, Epi, FT, and brain ventricle from WT adult mice. Heat shock cognate  
702 71 kDa protein (HSC70) serves as a loading control. Data are representative of two independent  
703 experiments. (i) Quantitation of the signal intensity of TAp73 bands relative to that of HSC70 (h)  
704 is shown. All data are presented as mean  $\pm$  SEM with \* $P<0.05$ .

705 **Fig. 2. TAp73 controls multiciliogenesis in the male reproductive tract.** (a) Representative  
706 images of hematoxylin and eosin (H&E) staining of Epi sections from WT and *TAp73* knockout  
707 (KO) animals. Bracket lines demarcate the border of EDs and Epi. Notice the lack of mature  
708 spermatozoa in cauda Epi from *TAp73* KO mice (arrowheads). (b) Representative images of the  
709 expression of Ac- $\alpha$ -TUB (green) and axonemal dynein DNAL1 (red) in EDs from WT and *TAp73*  
710 KO mice. DAPI staining (blue) labels nuclei. Boxed regions are magnified in the bottom panel.  
711 Note that *TAp73* KO mice have less cilia that also exhibit reduced length (white bars). (c)  
712 Quantitation of Ac- $\alpha$ -TUB and DNAL1 signals normalized to epithelial length. Data from a single  
713 experiment are shown (WT,  $n=6$  images from 3 animals; *TAp73* KO,  $n=11$  images from 4 animals).  
714 (d) Representative photomicrographs of transmission electron microscopy (TEM) in EDs from WT  
715 and *TAp73* KO mice. Dotted lines mark apical region of the cells. Notice the abundant cilia (white  
716 arrows) and clustered basal bodies (white arrowhead) docked to the apical surface of WT cells,  
717 whereas mutant cells exhibit fewer cilia (red arrow). Interspersed microvilli are marked with  
718 asterisks. (e) Chromatin immunoprecipitation was performed for Saos2 cells transfected with  
719 TAp73 $\alpha$ , TAp73 $\beta$ , and empty vector. Binding of TAp73 $\alpha$  and TAp73 $\beta$  to genomic regions of  
720 *FOXJ1*, axonemal dyneins *DNALI1* and *DNAI1* was evaluated by quantitative PCR and compared  
721 to vector control ( $n=3$  for each antibody/gene pair, except for *DNALI1* [ $n=4$ ], genomic regions  
722 examined are illustrated in **Supplementary Fig. 3**; [76]). (f) Semi-quantitative PCR analysis of  
723 *Dnali1*, *Foxj1*, *Rfx2*, and *Rfx3* expression in EDs from WT and *TAp73* KO mice. Data from a single  
724 experiment are shown (WT,  $n=4$  for *Dnali1*, *Foxj1*, and *Rfx3*,  $n=3$  for *Rfx2*; *TAp73* KO,  $n=3$ ). (g)  
725 Immunoblot analysis of the expression of TAp73,  $\Delta$ Np73, DNAL1, and DNAL11 in Epi from WT and  
726 *TAp73* KO animals. HSC70 serves as a loading control. Representative result of three  
727 independent experiments is displayed. All data are presented as mean  $\pm$  SEM and relative to the  
728 WT group with \* $P<0.05$ , \*\*  $P<0.01$ , \*\*\*  $P<0.001$ .

729 **Fig. 3. TAp73 controls multiciliogenesis in the oviducts.** (a) Representative H&E staining of  
730 FTs from WT and *TAp73* KO animals. (b) The expression of Ac- $\alpha$ -TUB (green) and DNAI1 (red)  
731 in FTs from WT and *TAp73* KO mice. DAPI staining (blue) labels nuclei. Boxed regions are  
732 magnified in the bottom panel. In contrast to multiciliated epithelia in WT mice, *TAp73* KO mice  
733 exhibit FT segments devoid of cilia (arrowheads). (c) Quantitation of Ac- $\alpha$ -TUB and DNAI1 signals  
734 normalized to epithelial length. Data from a single experiment are shown (WT,  $n=6$  images from  
735 4 mice; *TAp73* KO,  $n=6$  images from 3 mice). (d) Representative TEM photomicrographs of FTs  
736 from WT and *TAp73* KO animals. Dotted lines mark apical region of the cells. Notice the presence  
737 of abundant cilia (black arrows) and basal bodies (white arrowhead) docked at the apical surface  
738 of WT cells, whereas mutant cells display fewer cilia (red arrows). Interspersed microvilli are  
739 marked with asterisks. (e) Semi-quantitative PCR analysis of *Dnali1*, *Foxj1*, *Rfx2*, and *Rfx3*  
740 expression in oviducts from WT and *TAp73* KO mice. Data from a single experiment are shown  
741 ( $n=3$ ). (f) Immunoblot analysis of the expression of TAp73,  $\Delta$ Np73, FOXJ1, DNAI1, DNALI1, and  
742 gamma tubulin ( $\gamma$ -TUB) in oviducts from WT and *TAp73* KO animals. HSC70 serves as a loading  
743 control. Data are representative of three independent experiments. All data are presented as mean  
744  $\pm$  SEM and relative to the WT group with \* $P < 0.05$ , \*\*  $P < 0.01$ .

745  
746 **Fig. 4. TAp73 is dispensable for brain multiciliogenesis.** (a) The expression of KI-67,  
747 Aquaporin 1 (AQP1, green), and ADP-ribosylation factor-like 13b (ARL13B, red) in WT hindbrain  
748 roof plate/CP at embryonic (E) day 14.5. Notice that KI-67<sup>+</sup> roof plate progenitors, and AQP1<sup>+</sup> CP  
749 epithelial cells are spatially separated. ARL13B labels monociliated roof pate progenitors and  
750 multiciliated CP epithelial cells. White lines demarcate roof pate epithelium (KI-67<sup>+</sup>/AQP1<sup>-</sup>,  
751 arrows), CP epithelium (KI-67<sup>-</sup>/AQP1<sup>+</sup>, asterisks), and “transition zone” (KI-67<sup>-</sup>/AQP1<sup>-</sup>,  
752 arrowheads) in which MCCs appear. Dotted lines mark apical cell surface with cilia. DAPI staining  
753 (blue) labels nuclei. (b) Expression of TAp73 (green, red), AQP1 (green), and ARL13B (red) in  
754 WT hindbrain roof plate/CP at E14.5. Dotted lines mark apical cell surface of roof plate (TAp73<sup>-</sup>,

755 arrow) and transition zone (TAp73<sup>+</sup>, arrowhead). White lines mark transition zone (TAp73<sup>+</sup>/AQP1<sup>-</sup>  
756 , arrowhead) and CP epithelium (TAp73<sup>+</sup>/AQP1<sup>+</sup>, asterisk). DAPI staining (blue) labels nuclei. (c)  
757 Representative images of TAp73 expression of ependymal and CP epithelial cells in hindbrain  
758 and lateral ventricle from WT and *TAp73* KO. Red dotted lines mark ventricles lined with  
759 ependymal cells. Note that p73 expression is lost in *TAp73* KO mice. (d) Expression of the cilia  
760 marker ARL13B (red) in CP epithelial cells from WT and *TAp73* KO. White arrowheads mark cilia  
761 on cell surface. DAPI staining (blue) labels nuclei. Quantitation of average cilia length is shown in  
762 the lower panel. Data from a single experiment are shown (WT, *n*=12 cells [hindbrain] and 9 cells  
763 [lateral ventricle] from 2 mice; *TAp73* KO, *n*=17 cells [hindbrain] and 15 cells [lateral ventricle] from  
764 3 mice). (e) Immunoblot analysis of Ac- $\alpha$ -TUB in brain ventricles from WT and *TAp73* KO animals.  
765  $\beta$ -ACTIN serves as a loading control. Data are representative of two independent experiments. (f)  
766 Semi-quantitative PCR of *Dnali1*, *Foxj1*, *Rfx2*, and *Rfx3* in brain ventricles from WT and *TAp73*  
767 KO. Data from a single experiment are shown (WT, *n*=3; *TAp73* KO, *n*=4). (g) Movement of  
768 fluorescent beads along the ventricular system in WT and *TAp73* KO mice. Images of maximum  
769 intensity projections of representative movies of the lateral and the ventral 3<sup>rd</sup> ventricles are shown  
770 (WT, *n*=2; *TAp73* KO, *n*=3; *TAp73* heterozygous, *n*=1). Red arrows mark the direction of bead  
771 flow. Bracket lines depict ependymal layer lining the lateral ventricles. Refer to **Supplementary**  
772 **Video S3a, b** for examples of recording of ciliary beating. All data are presented as mean  $\pm$  SEM  
773 and relative to the WT group with \**P*<0.05, \*\* *P*<0.01.

774  
775 **Fig. 5. *TAp73* loss leads to changes in *miR-34/449* family and E2F4/MCIDAS circuit in the**  
776 **brain.** (a) Hierarchical clustering of differentially expressed miRNAs in brain ventricles from WT  
777 and *TAp73* KO mice (WT, *n*=3; *TAp73* KO, *n*=4, one-way ANOVA, FDR < 0.05, fold change is  
778 shown). log<sub>2</sub> values for miRNAs are plotted on the right. (b) *In situ* hybridization analysis of the  
779 expression of *miR449* in WT roof plate/CP at E14.5 (<http://www.eurexpress.org/ee/>) [77]). Semi-  
780 quantitative PCR analysis of *miR449a*, *miR34b*, and *miR34c* in brain ventricles (c), *miR449a*

781 expression in EDs, FTs, and trachea (**d**), and *E2f4* and *Mcidas* levels in brain ventricles (**e**) from  
782 WT and *TAp73* KO mice. Data from a single experiment are shown (WT: ED,  $n=3$ ; FT,  $n=7$ ;  
783 trachea,  $n=4$ ; ventricle,  $n=3$ . *TAp73* KO: ED,  $n=4$ ; FT,  $n=8$ ; trachea,  $n=4$ ; ventricle,  $n=4$ ). (**f**)  
784 Immunoblot of E2F4 in WT and *TAp73* KO ventricles.  $\beta$ -ACTIN serves as a loading control.  
785 Representative result of three independent experiments. (**g**) Luciferase assay of *miR449*  
786 regulatory regions containing E2F binding motifs. Three consensus E2F binding sites in *miR449*  
787 locus (<http://jaspar.binf.ku.dk/>) were placed in front of a luciferase cassette. A deletion mutant  
788 (Mut) that lacks the strongest consensus site was also created (**Supplementary Table 5**). WT or  
789 Mut luciferase vector was then co-transfected with empty vector (control), or vectors expressing  
790 E2F4, MCIDAS, or both. Fold changes in luciferase activities relative to those of control vector are  
791 shown. Data from 5 independent experiments are shown. All data are presented as mean  $\pm$  SEM  
792 and relative to the WT group with \* $P < 0.05$ , \*\*  $P < 0.01$ .

793  
794 **Fig. 6 TAp73 functions through miR449 in brain multiciliogenesis.** (**a**) Coronal brain slices  
795 from WT, *TAp73* KO, *miR449* KO and *TAp73xmiR449* KO mice. Note that *TAp73xmiR449* KO  
796 mice display enlarged lateral ventricles. (**b**) ARL13B (red) expression in CP epithelial cells of the  
797 4<sup>th</sup> and lateral ventricles from WT, *miR449* KO, and *TAp73xmiR449* KO animals. White  
798 arrowheads mark cilia on cell surface. DAPI staining (blue) labels nuclei. (**c**) Quantitation of  
799 average cilia length of CP epithelial cells shown in (**b**). Data from a single experiment are shown  
800 (WT,  $n=4$  cells [hindbrain, lateral ventricle] from 2 mice; *miR449* KO,  $n=18$  cells [hindbrain] and  
801 14 cells [lateral ventricle] from 4 mice; *TAp73xmiR449* KO,  $n=8$  cells [hindbrain, lateral ventricle]  
802 from 3 mice). (**d**) Representative TEM photomicrographs of ependymal cells in WT, *TAp73* KO,  
803 and *TAp73xmiR449* KO mice. Dotted lines mark apical region of the cells. Notice that WT cells  
804 possess cilia (white arrow) and basal bodies (white arrowhead) docked to the apical surface,  
805 whereas mutant cells have a similar number of cilia (red arrows) but disorganized basal bodies  
806 (red arrowheads) located further away from the apical surface. Interspersed microvilli are marked

807 with asterisks. (e) Representative staining of Ac- $\alpha$ -TUB (green) in tracheae from WT and  
808 *TAp73xmiR449* KO mice. DAPI staining (blue) labels nuclei. Note that mutants harbor less and  
809 shorter cilia (arrowhead) than WT. (f) Quantitation of Ac- $\alpha$ -TUB signals normalized to epithelial  
810 length is shown. Data from a single experiment are shown ( $n=4$  samples/genotype). (g)  
811 Representative TEM photomicrographs of tracheae from WT and *TAp73xmiR449* KO mice. Dotted  
812 lines mark apical region of the cells. Notice the abundant cilia (black arrows) and clustered basal  
813 bodies (white arrowhead) docked to apical surface in WT cells, whereas mutant cells exhibit fewer  
814 cilia (red arrow). Interspersed microvilli are marked with asterisks. All data are presented as mean  
815  $\pm$  SEM and relative to the WT group with \*\*  $P < 0.01$ , \*\*\*  $P < 0.001$ .

816  
817 **Fig. 7. Schematic diagram of the molecular circuits of TAp73-driven multiciliogenesis in**  
818 **diverse tissues.** (a) TAp73-dependent transcriptional network, including dyneins, *miR34bc*,  
819 *Foxj1*, *Rfx2*, and *Rfx3* factors, critically regulates multiciliogenesis in various ciliated epithelia  
820 downstream of *E2f4/Mcidas*. In the EDs (b) and FTs (c) *TAp73* KO impairs multiciliogenesis  
821 concurrent with male and female fertility. (d) TAp73 is not essential for multiciliogenesis in the  
822 brain; however, *TAp73* loss leads to upregulation of pro-ciliogenic *E2f4* and its target *miR449*. (e)  
823 Further removal of *miR449* in *TAp73* KO animals leads to reduced number and length of CP cilia  
824 and severe hydrocephalus, indicating that *miR449* and TAp73 complement each other to support  
825 brain ciliogenesis.



Wildung et al. Figure 1

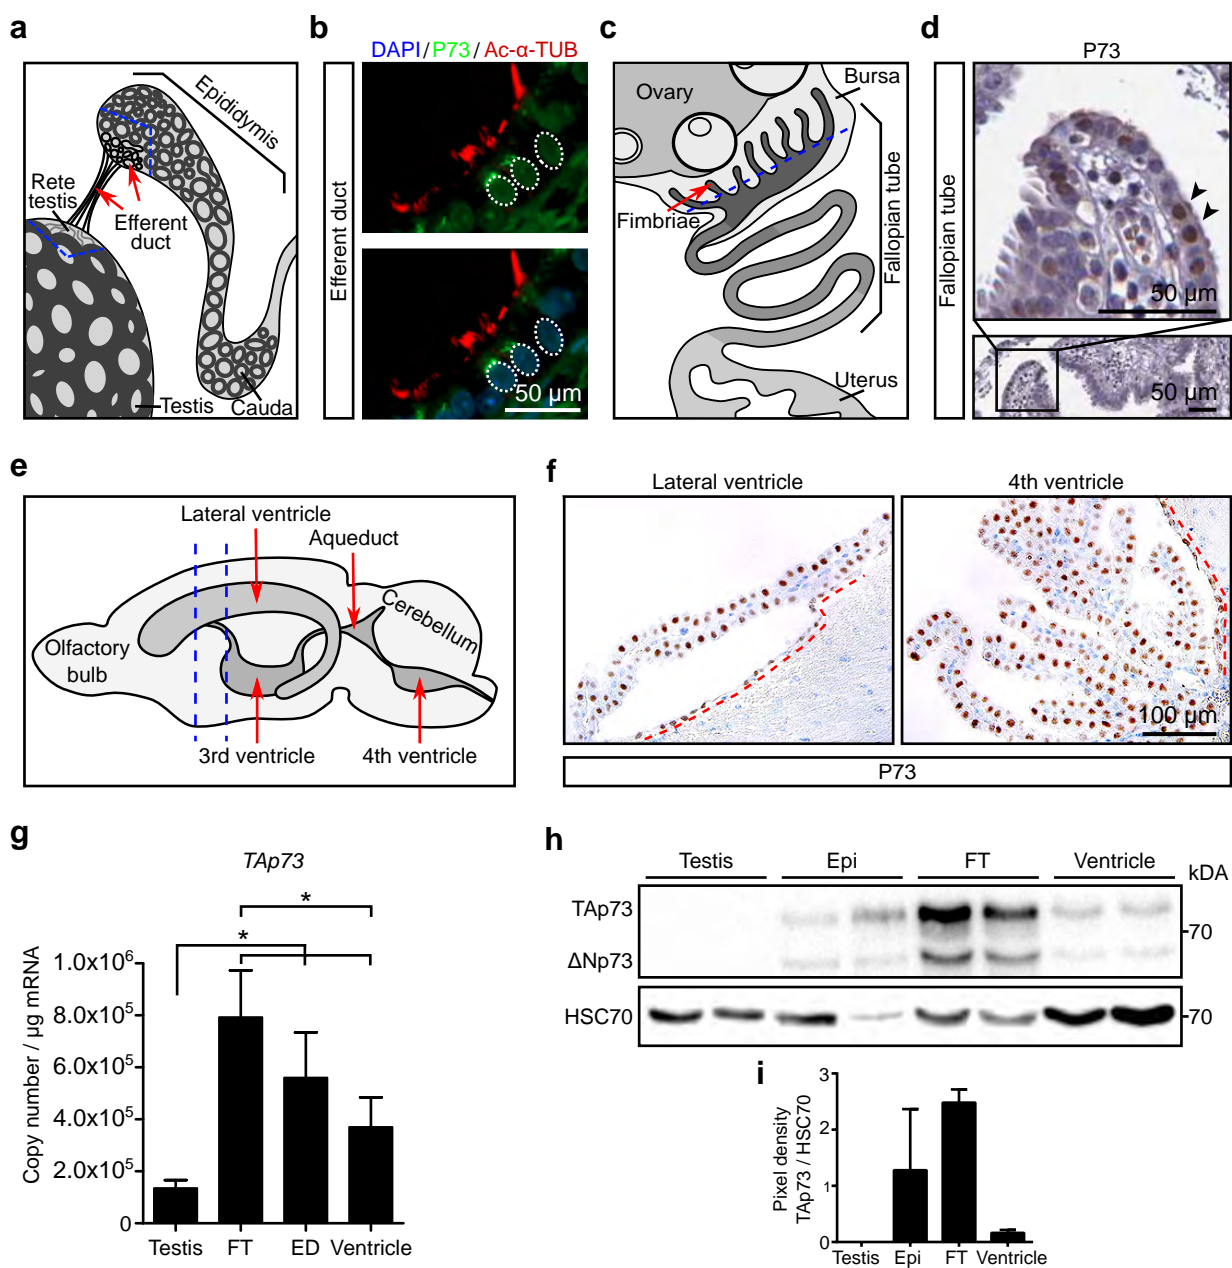

Wildung et al. Figure 2

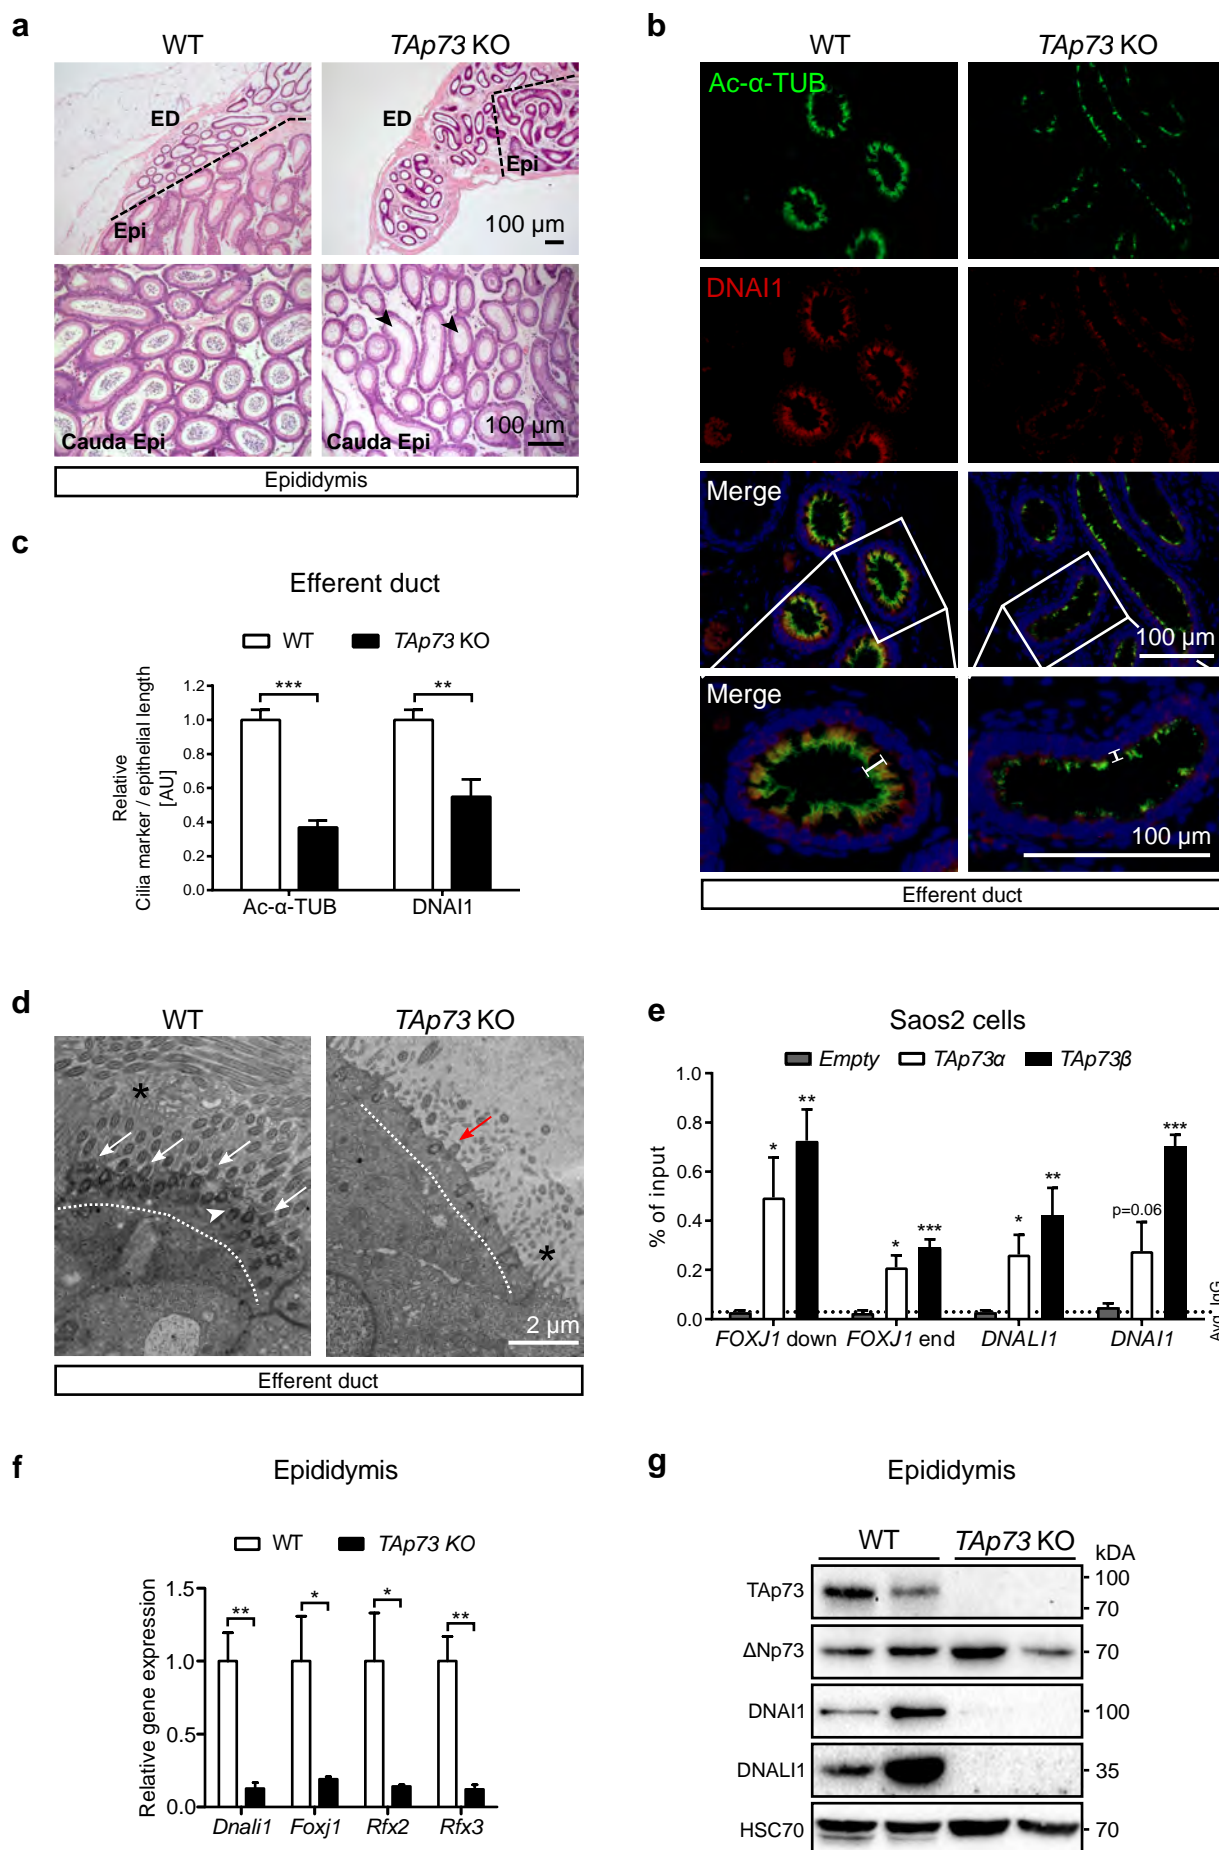

Wildung et al. Figure 3

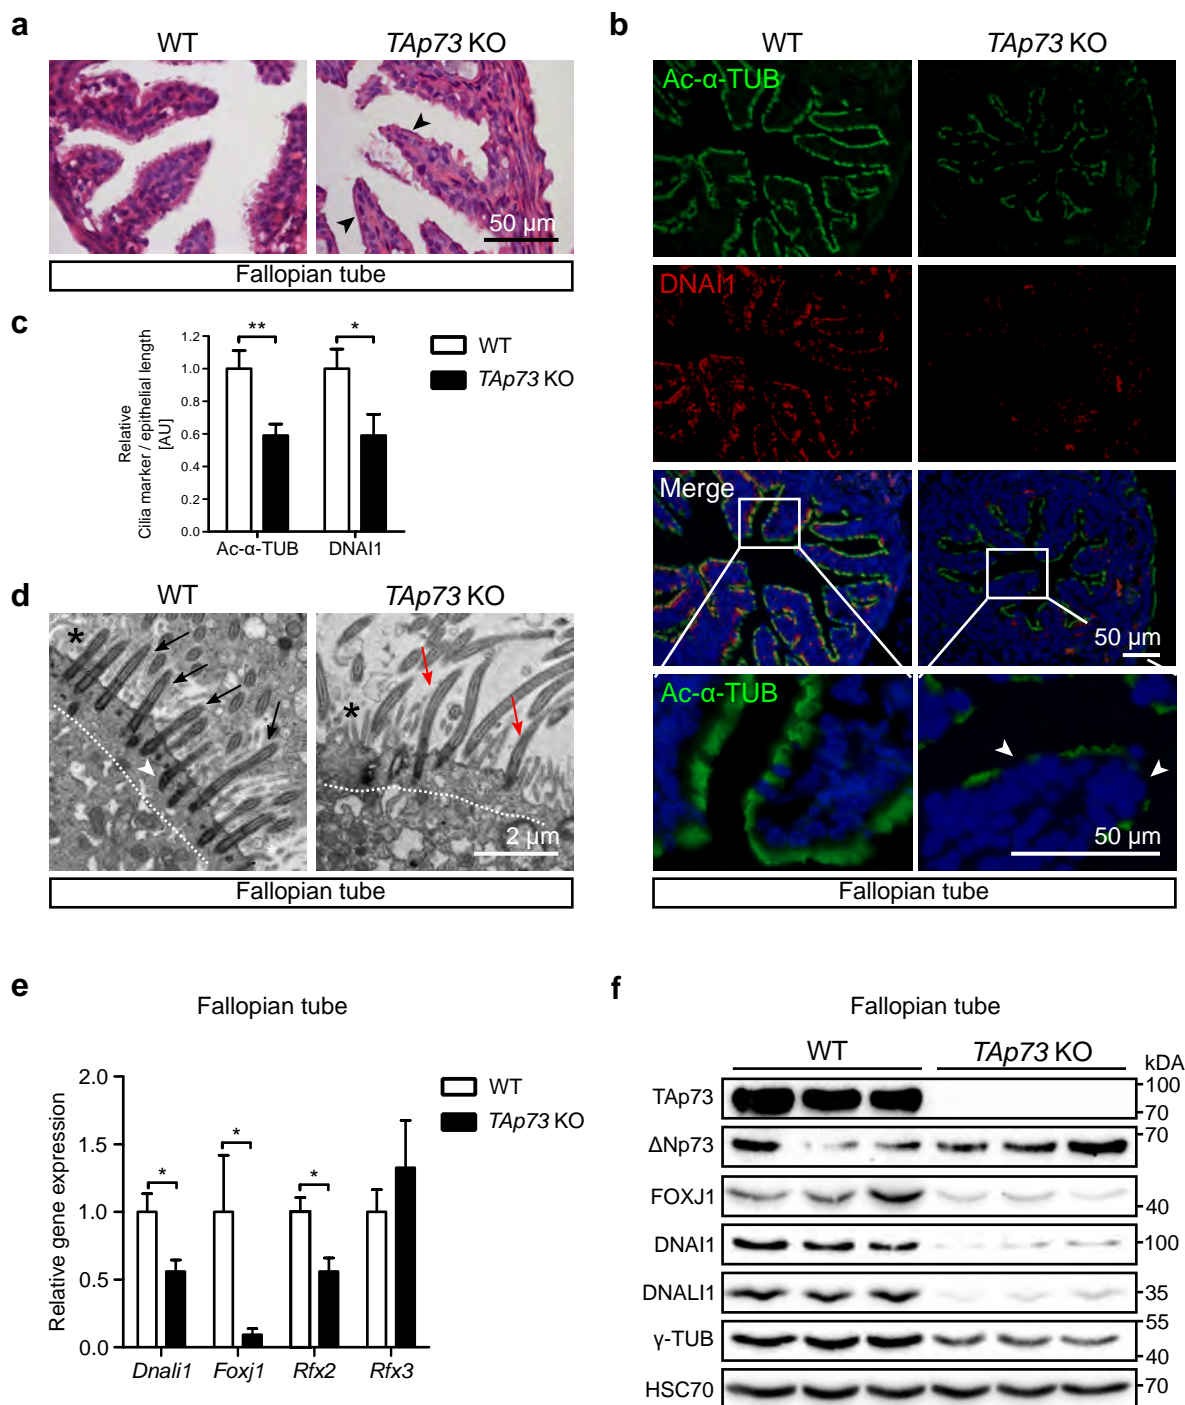

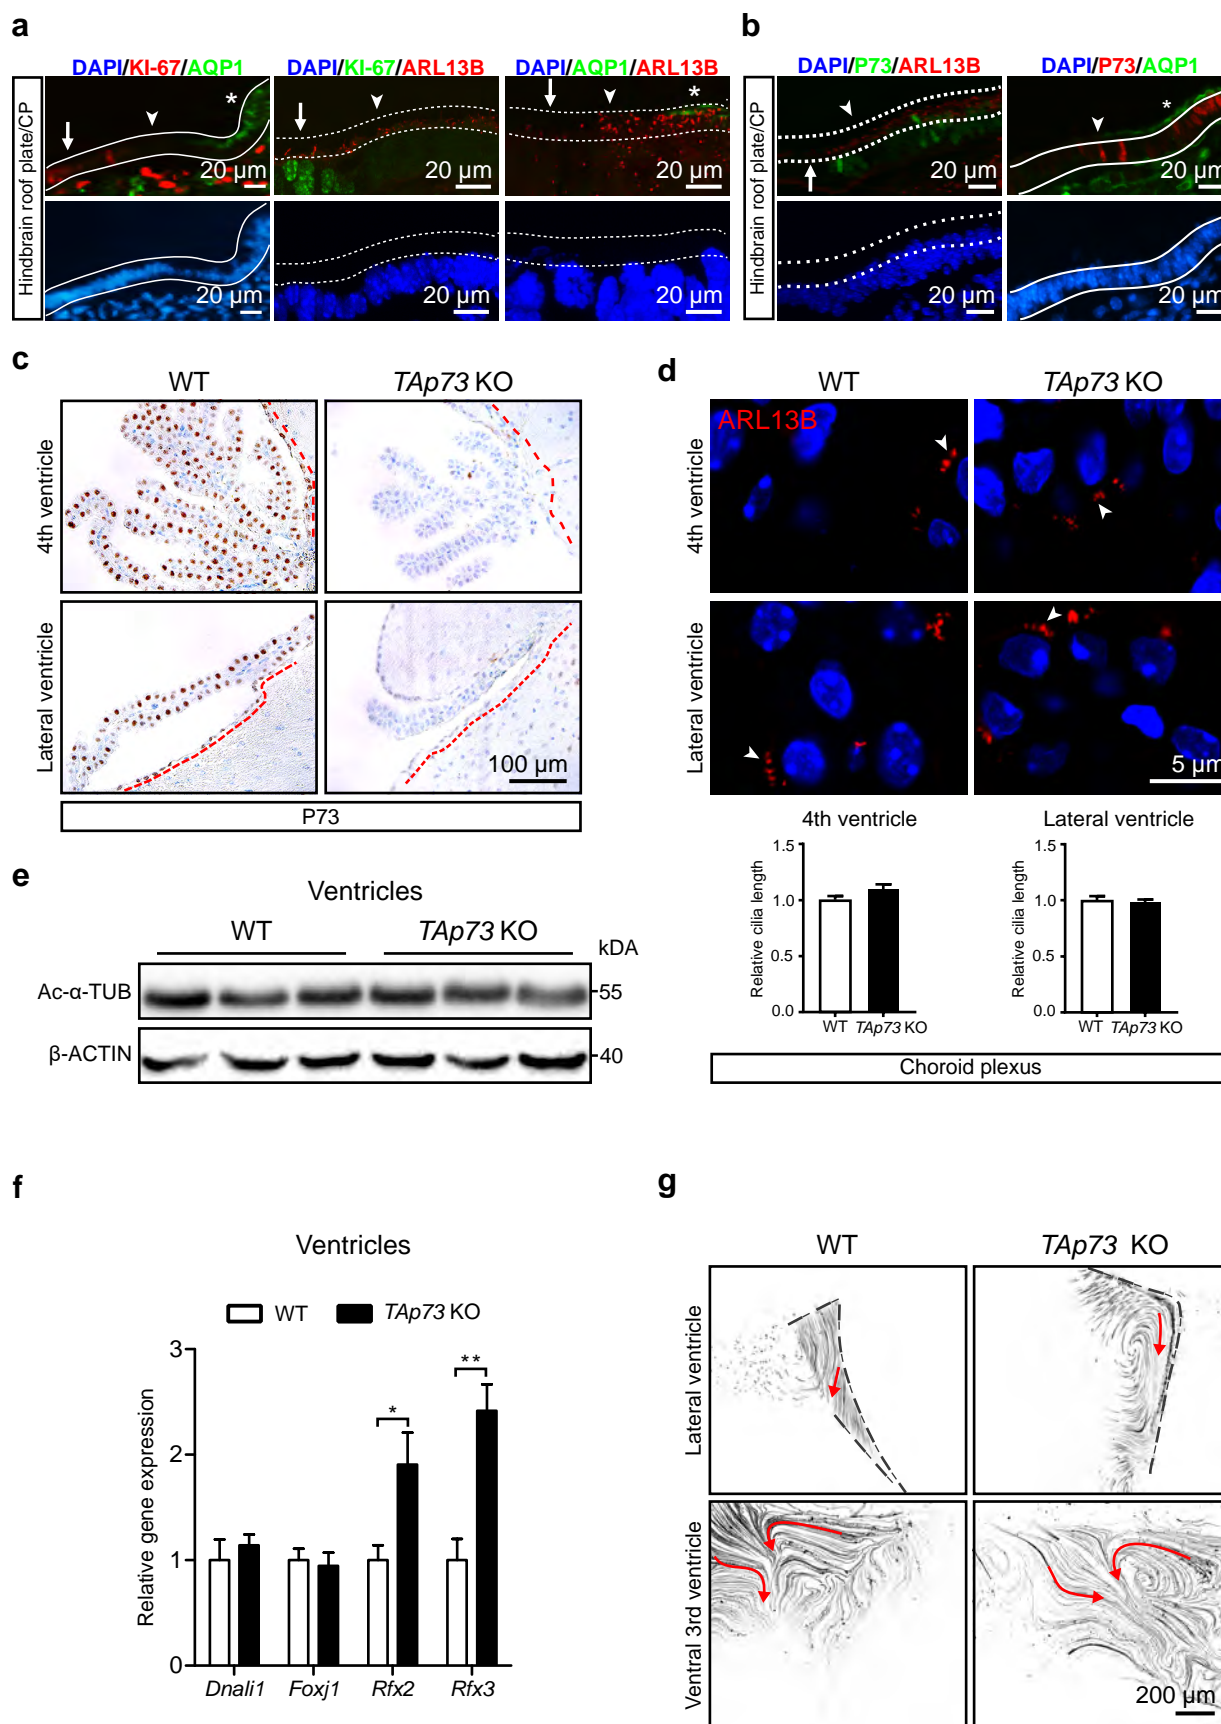

Wildung et al. Figure 5

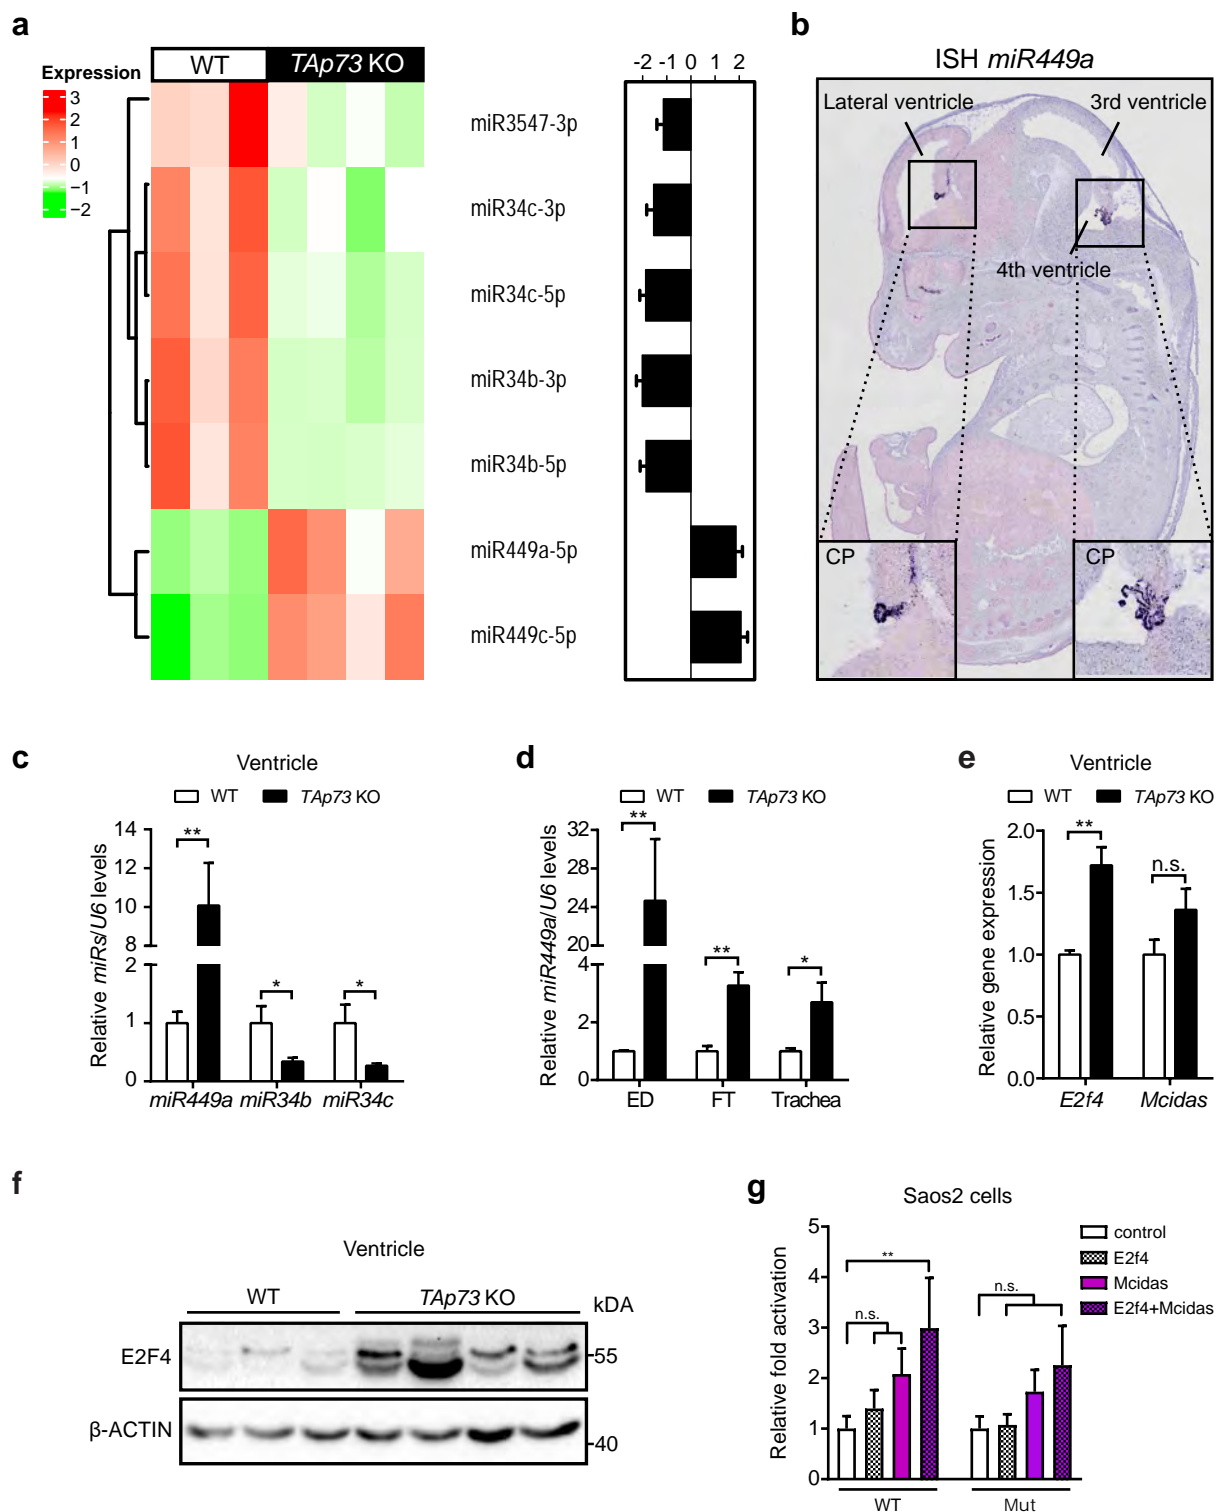

Wildung et al. Figure 6

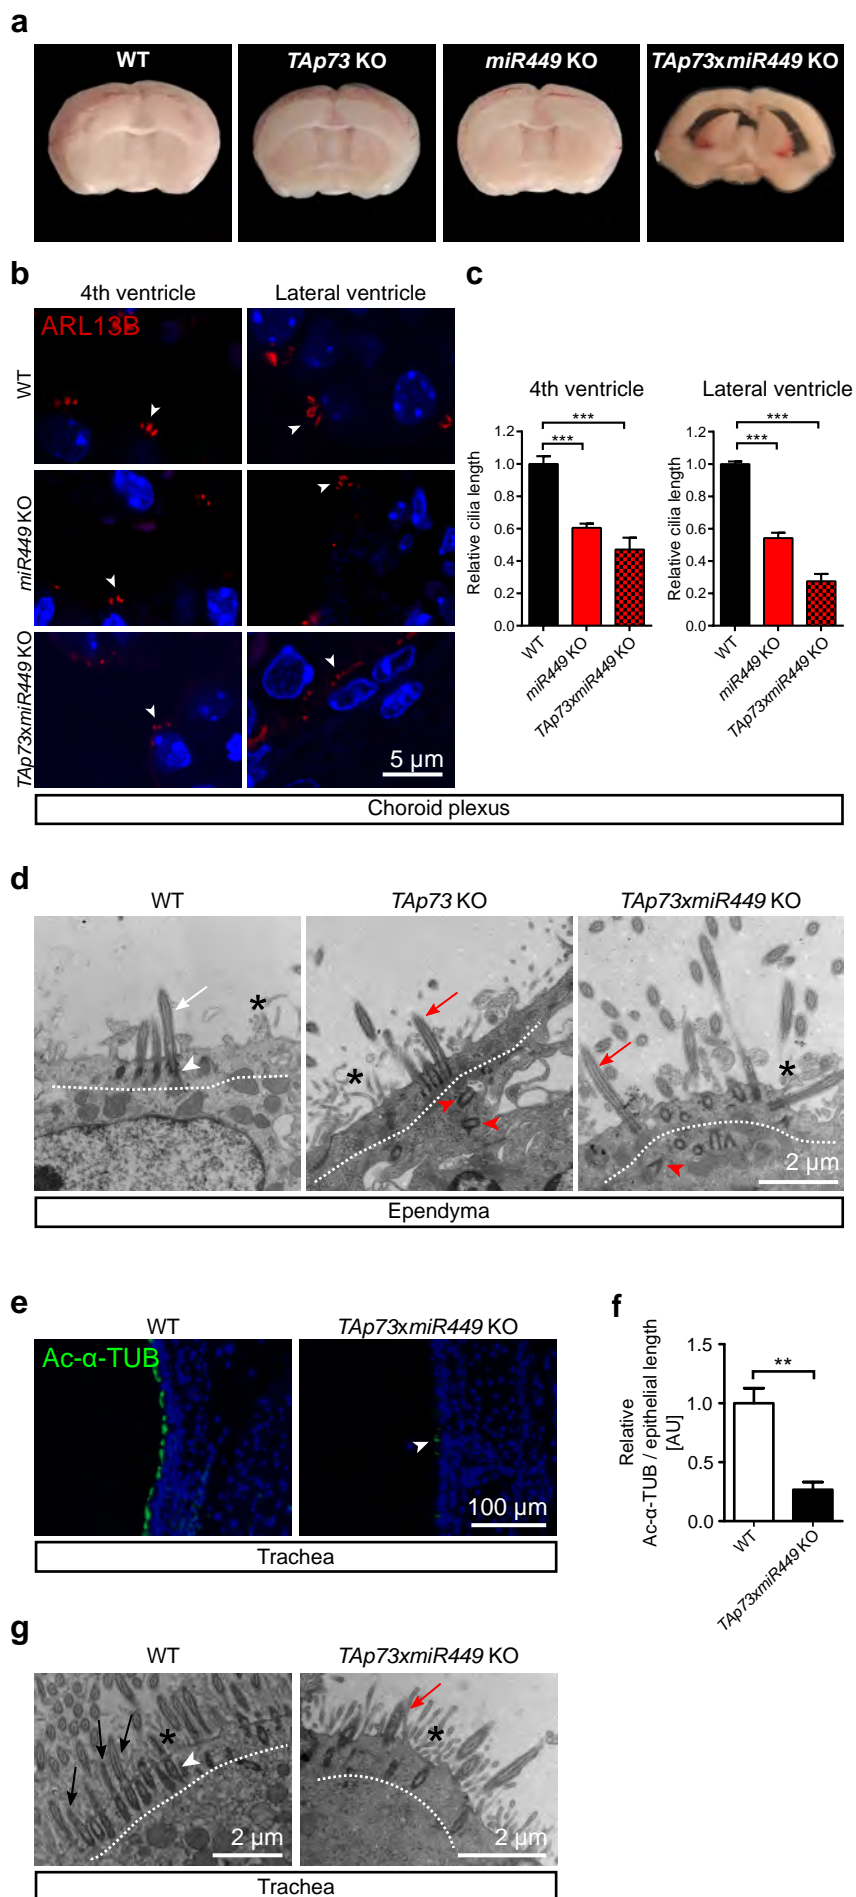

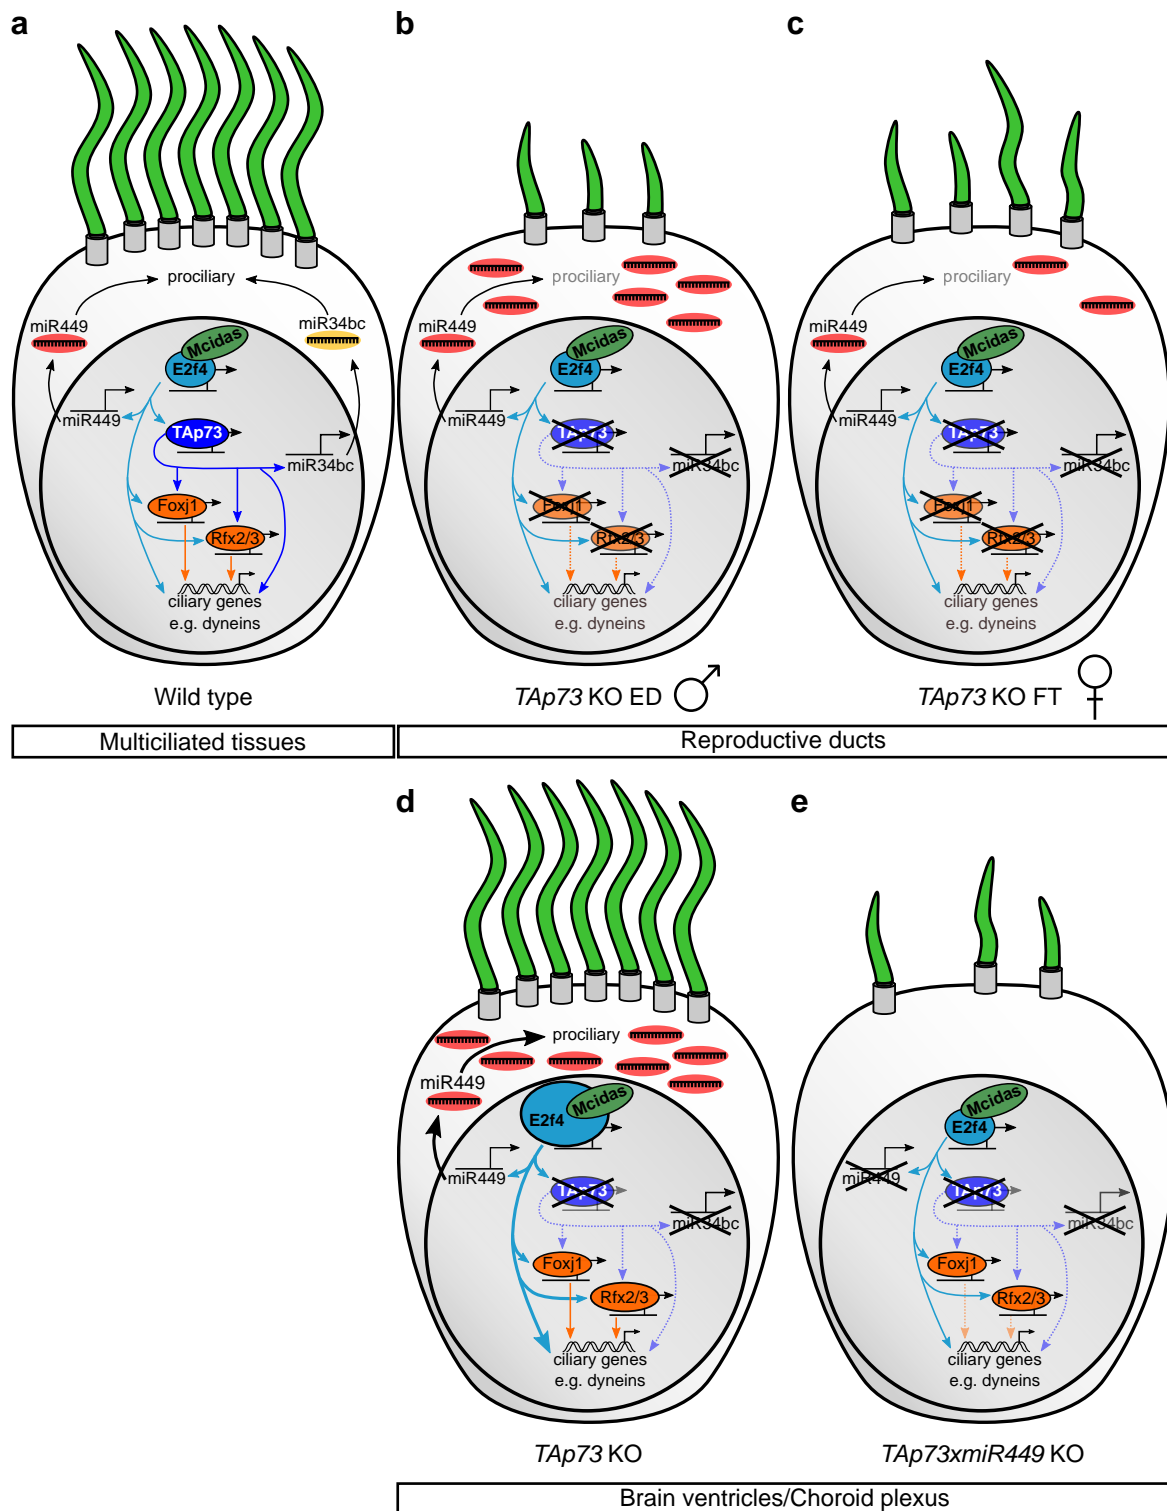

## Supplementary information

### **Transcription factor TAp73 and microRNA-449 complement each other to support multiciliogenesis**

**Running title:** TAp73 and miR449 cooperate in multiciliogenesis

Merit Wildung<sup>1,\*</sup>, Tilman Uli Esser<sup>1,\*</sup>, Katie Baker Grausam<sup>2,3</sup>, Cornelia Wiedwald<sup>1</sup>, Larisa Volceanov-Hahn<sup>1</sup>, Dietmar Riedel<sup>4</sup>, Sabine Beuermann<sup>1</sup>, Li Li<sup>2</sup>, Jessica Zylla<sup>2</sup>, Ann-Kathrin Guenther<sup>5</sup>, Magdalena Wienken<sup>6</sup>, Evrim Ercetin<sup>1</sup>, Zhiyuan Han<sup>7</sup>, Felix Bremmer<sup>8</sup>, Orr Shomroni<sup>9</sup>, Stefan Andreas<sup>1</sup>, Haotian Zhao<sup>2,3,7,#</sup> and Muriel Lizé<sup>1,#</sup>

\* = equal contribution; # = corresponding authors

#### Content:

Supplementary Figures 1-12 are shown on pages 2-14.

Supplementary tables 1-6, including the list of antibody, primers, and luciferase constructs, are shown on pages 15-18.

Supplementary video legends and reference from the figure legend are shown on page 19.



## Supplementary Figures

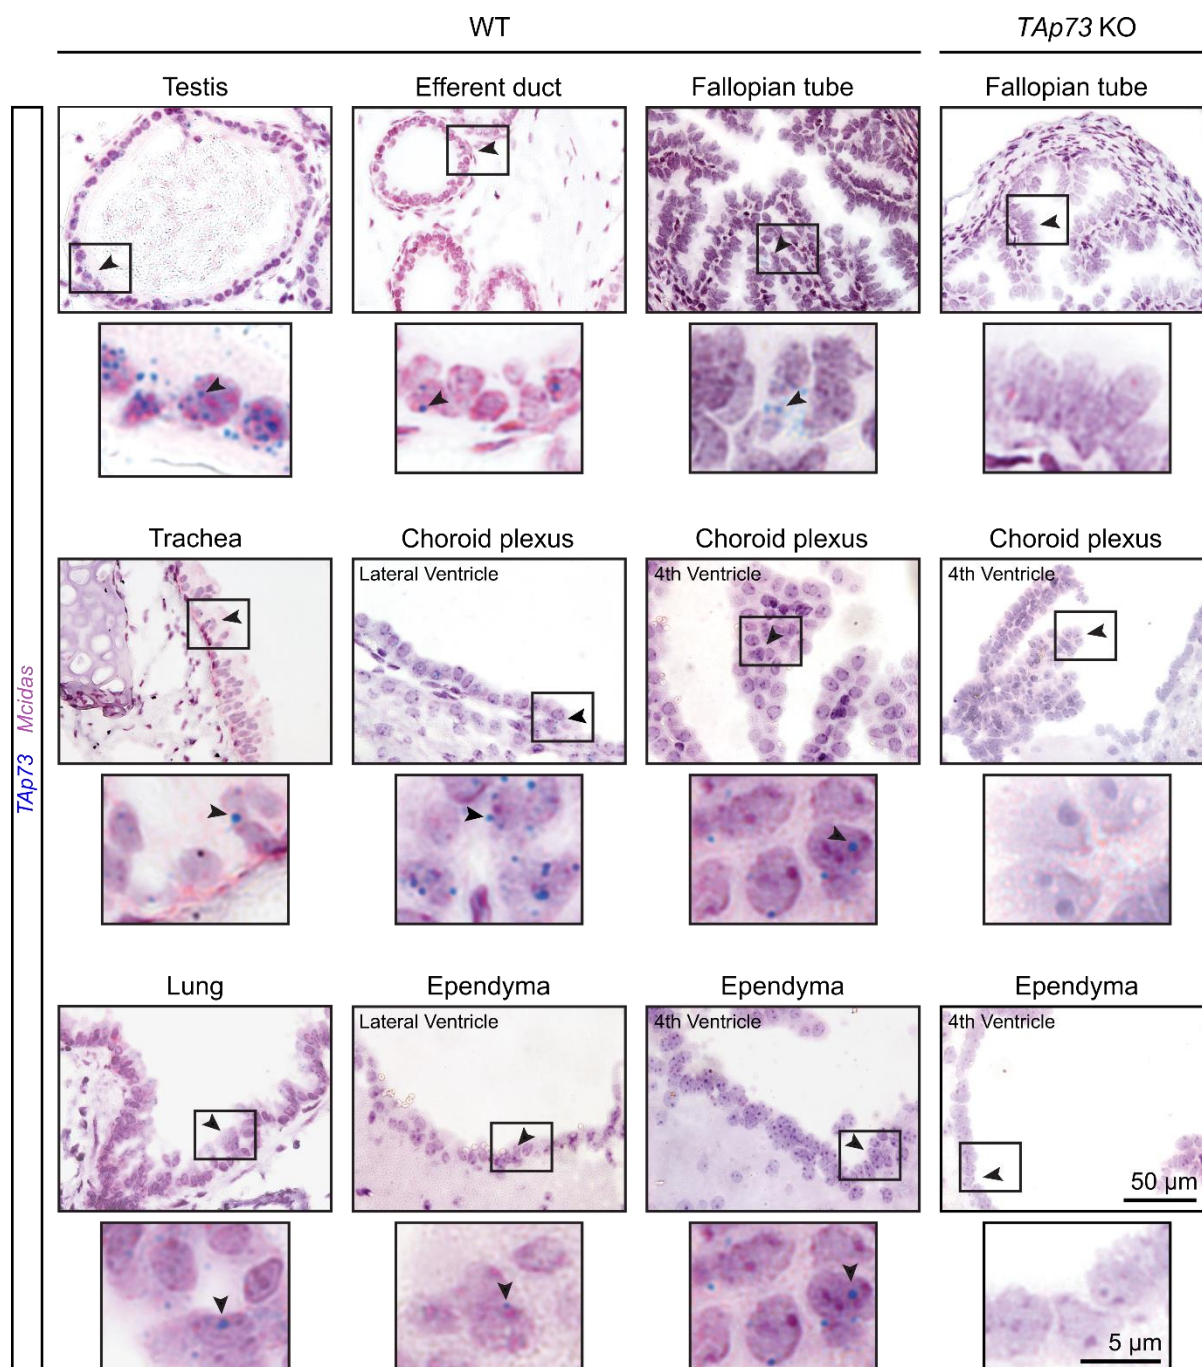

**Supplementary Fig. 1. TAp73 is expressed in diverse multiciliated tissues.** RNAscope analysis of *TAp73* (blue) and *Mcidas* (red) expression in testis, efferent ducts, fallopian tube, trachea, lung, ependymal and choroid plexus epithelial cells in hindbrain and lateral ventricle from adult wild type (WT) and *TAp73* knockout (KO) mice (3 months of age). Arrowheads mark cells in boxed regions that are also shown in higher magnification. Notice that *TAp73* is absent in *TAp73* KO tissues.

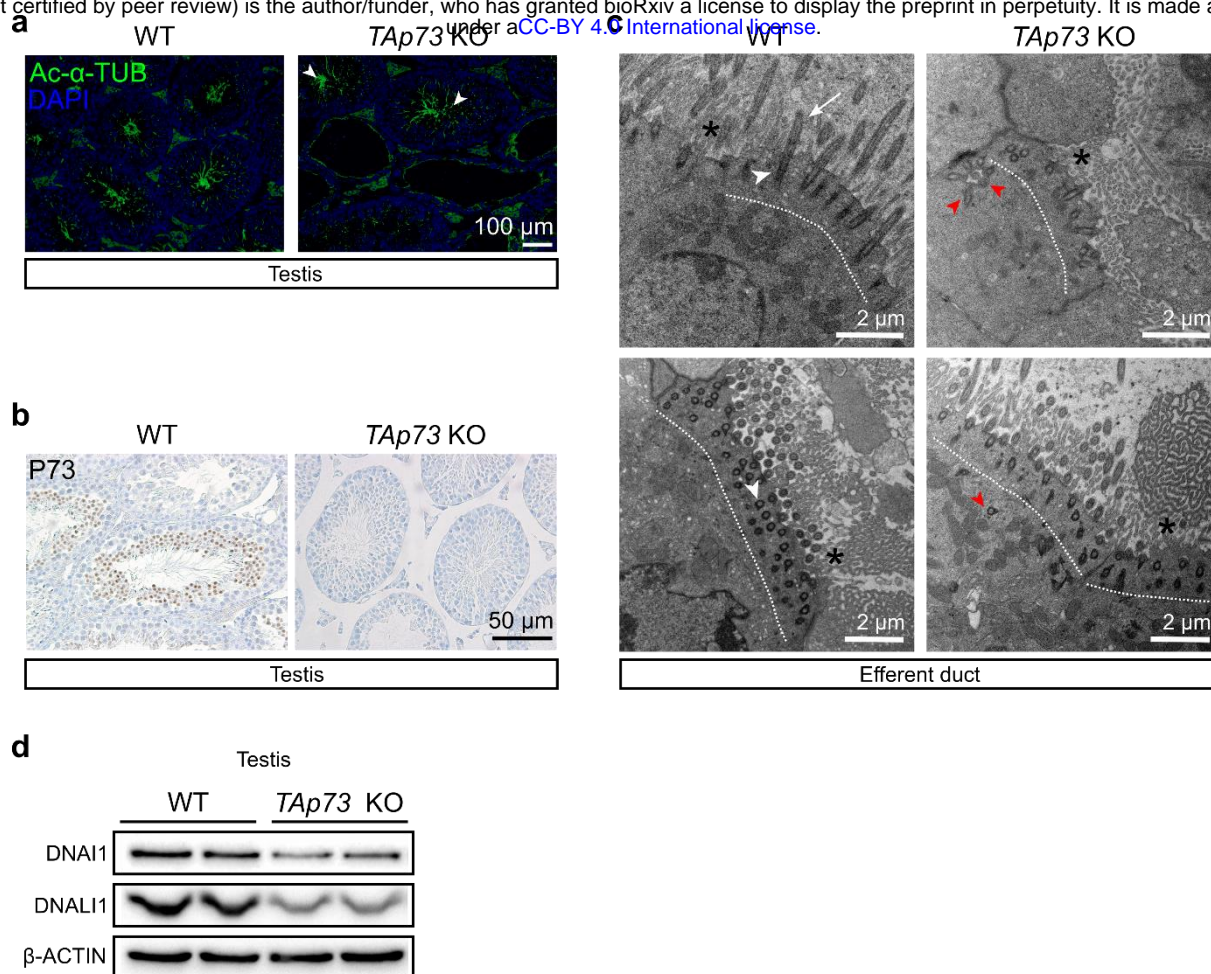

**Supplementary Fig. 2. Loss of *TAp73* impairs multiciliogenesis in the male reproductive duct.** (a) Representative images of the expression of acetylated alpha-tubulin (Ac- $\alpha$ -TUB, green) in testes from WT and *TAp73* KO mice. DAPI staining (blue) labels nuclei. Notice, although at a reduced level, spermatozoa (Ac- $\alpha$ -TUB<sup>+</sup>) are present in mutant testis (arrowheads). (b) Expression of *TAp73* in testes from WT and *TAp73* KO mice at 3 months of age, respectively. Notice that *TAp73* is expressed in testes from WT mice, but absent in mutant testes. (c) Representative photomicrographs of transmission electron microscopy (TEM) of efferent ducts from WT and *TAp73* KO mice. Dotted lines mark apical region of the cells. Notice the abundant cilia (white arrow) and clustered basal bodies (white arrowheads) on WT cells, whereas mutant cells exhibit disorganized basal bodies (red arrowheads) located away from apical surface. Interspersed microvilli are marked with asterisks. (d) Immunoblot analysis of the expression of DNAL1 and DNAL1 in testes from WT and *TAp73* KO animals.  $\beta$ -ACTIN serves as a loading control. DNAL1 and DNAL1 levels are reduced in mutant testis compared to WT animals. Representative results of three independent experiments are shown.

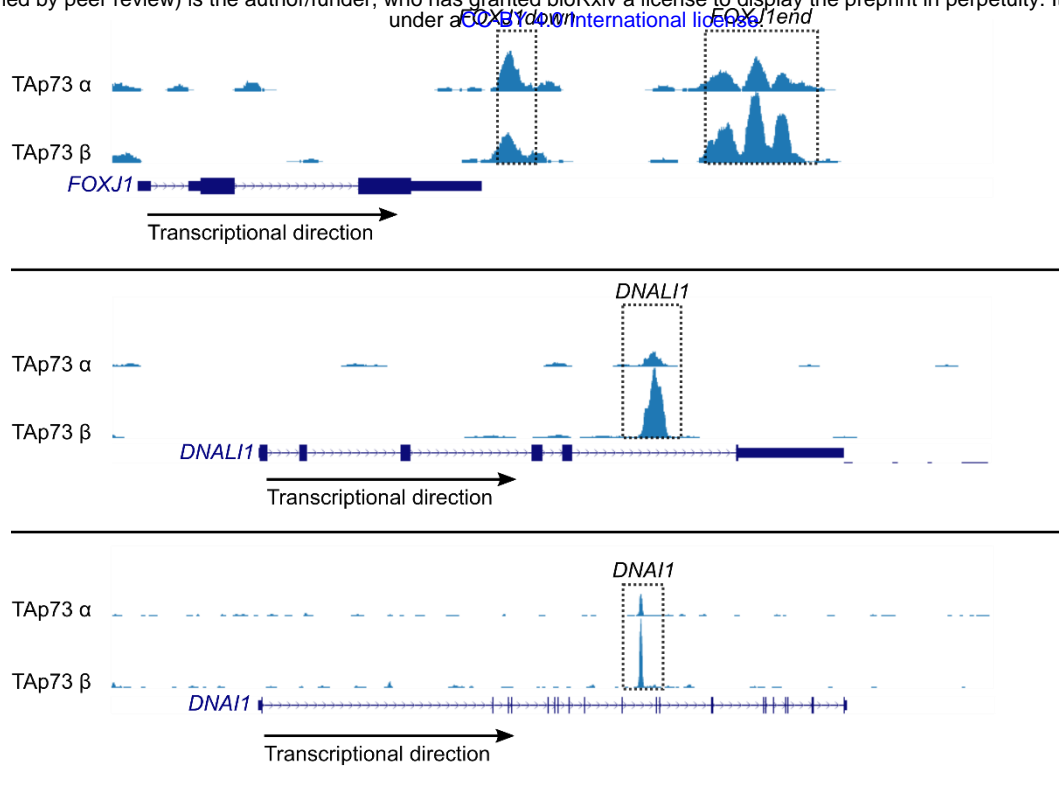

**Supplementary Fig. 3. TAp73 is associated with ciliary genes.** TAp73 binding at *FOXJ1*, *DNALI1*, and *DNAI1* genomic loci is shown in results from ChIP-seq [1], Geo accession no. **GSE15780**). Boxed regions mark genomic loci enriched with TAp73 binding and validated by ChIP-qPCR (**Fig. 2e**).

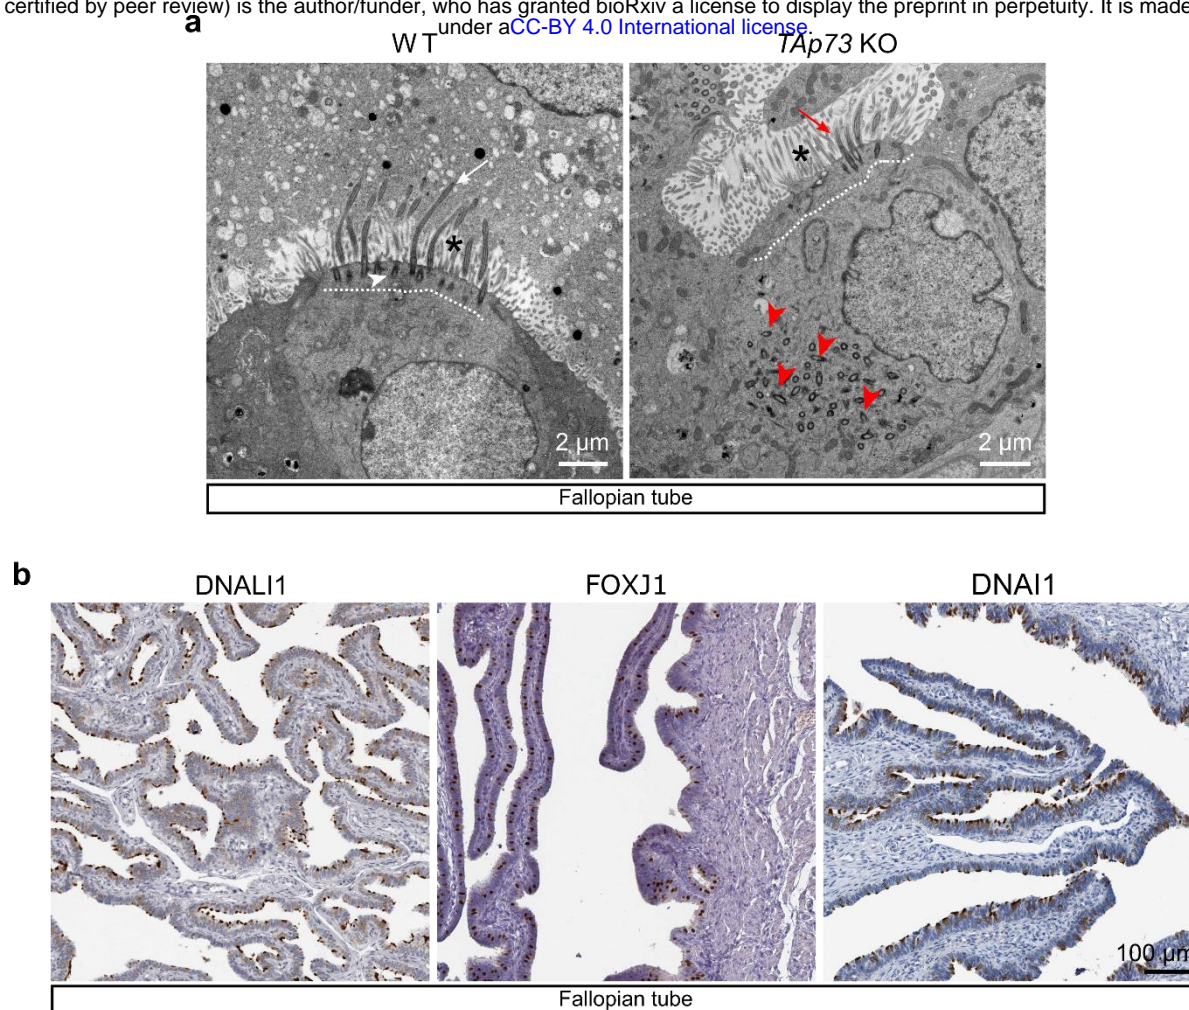

**Supplementary Fig. 4. *TAp73* KO mice show defective motile cilia in the fallopian tube.**

**(a)** Representative photomicrographs of transmission electron microscopy (TEM) of fallopian tubes from WT and *TAp73* KO mice. Dotted lines mark apical region of the cells. Notice the presence of abundant cilia (white arrow) and clustered basal bodies (white arrowhead) docked to apical surface of the WT cell, whereas the mutant cell displays fewer cilia (red arrow) and disorganized basal bodies (red arrowheads) located away from apical surface. Interspersed microvilli are marked with asterisks. **(b)** Expression of DNALI1, FOXJ1, and DNAI1 in human FT epithelia. Images were retrieved from the Human Protein Atlas (DNALI1: <http://www.proteinatlas.org/ENSG00000163879-DNALI1/tissue/fallopian+tube>, FOXJ1: <http://www.proteinatlas.org/ENSG00000129654-FOXJ1/tissue/fallopian+tube>, DNAI1: <http://www.proteinatlas.org/ENSG00000122735-DNAI1/tissue/fallopian+tube>).

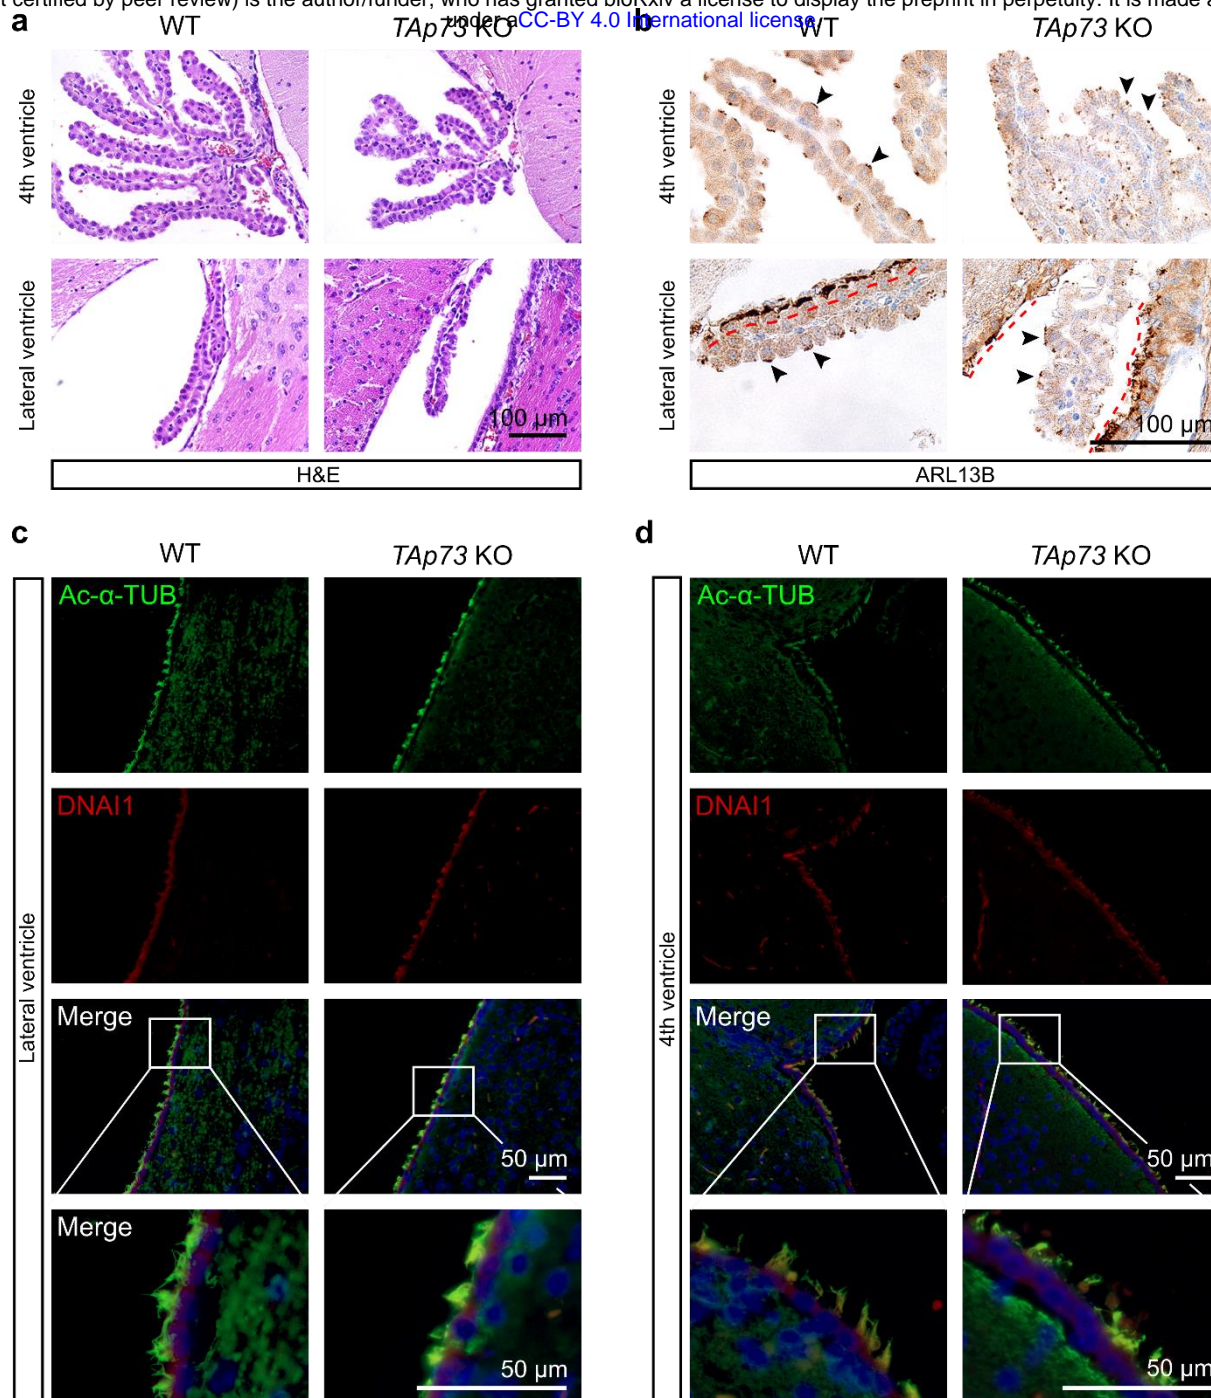

**Supplementary Fig. 5. *TAp73* loss does not affect multiciliogenesis in the brain.** (a) Representative images of H&E staining of choroid plexus (CP) in the 4<sup>th</sup> and lateral ventricle from WT and *TAp73* KO animals. (b) Representative images of the expression of ARL13B in CP of the 4<sup>th</sup> and lateral ventricle from WT and *TAp73* KO animals. Arrowheads mark cilia on CP epithelial cells. Red dotted lines delineate the boundary of lateral ventricles lined with ependymal cells. Expression of Ac- $\alpha$ -TUB (green) and DNAI1 (red) in ependymal cells of lateral ventricle (c) and the 4<sup>th</sup> ventricle (d) from WT and *TAp73* KO animals. Boxed regions are magnified in bottom panels. DAPI staining (blue) labels nuclei.

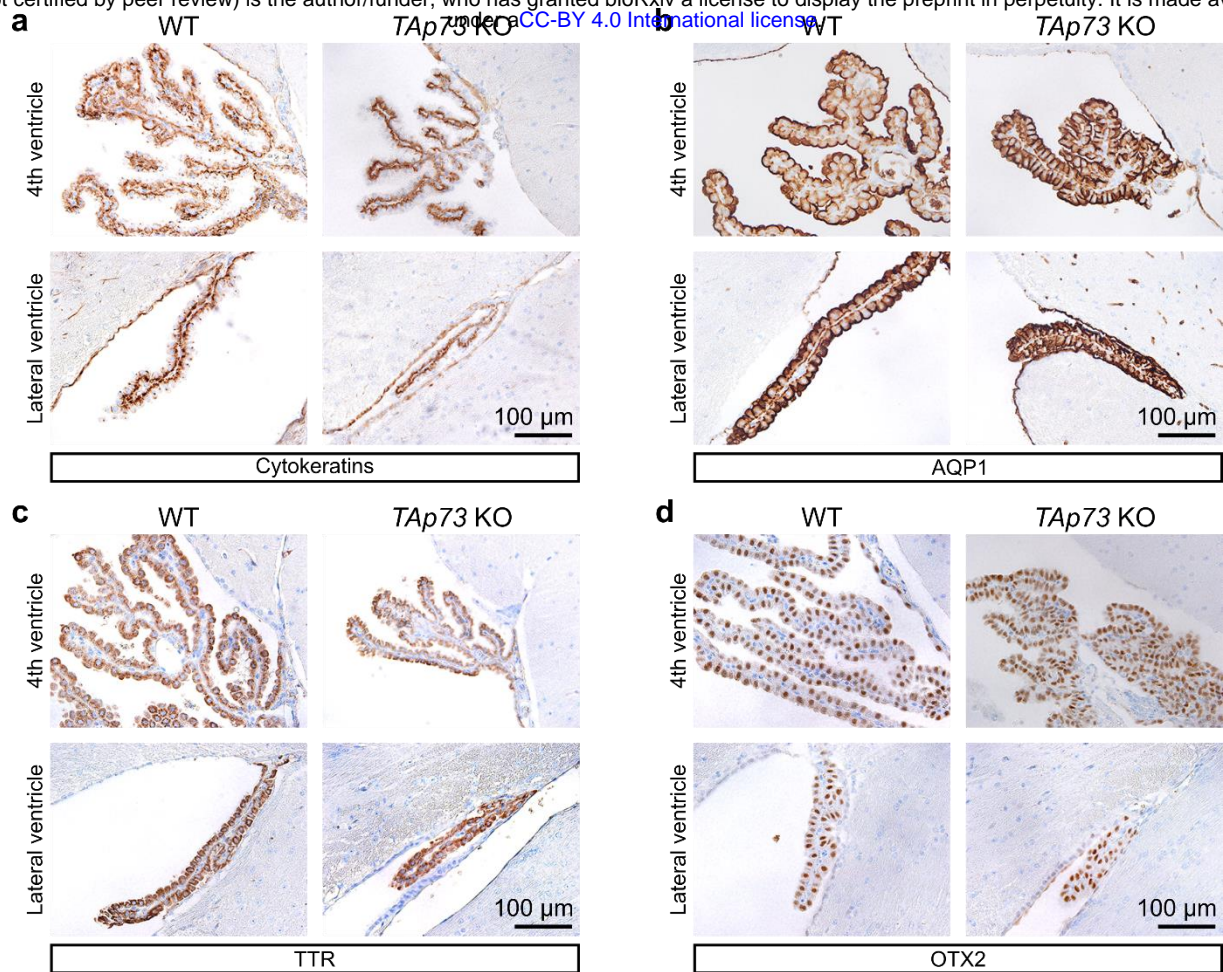

**Supplementary Fig. 6. *TAp73* loss does not affect epithelial differentiation of choroid plexus cells.** Representative images of the expression of cytokeratins (**a**), aquaporin 1 (AQP1, **b**), transthyretin (TTR, **c**), and orthodenticle homeobox 2 (OTX2, **d**) in CP epithelium of the 4<sup>th</sup> and lateral ventricles from WT and *TAp73* KO animals.

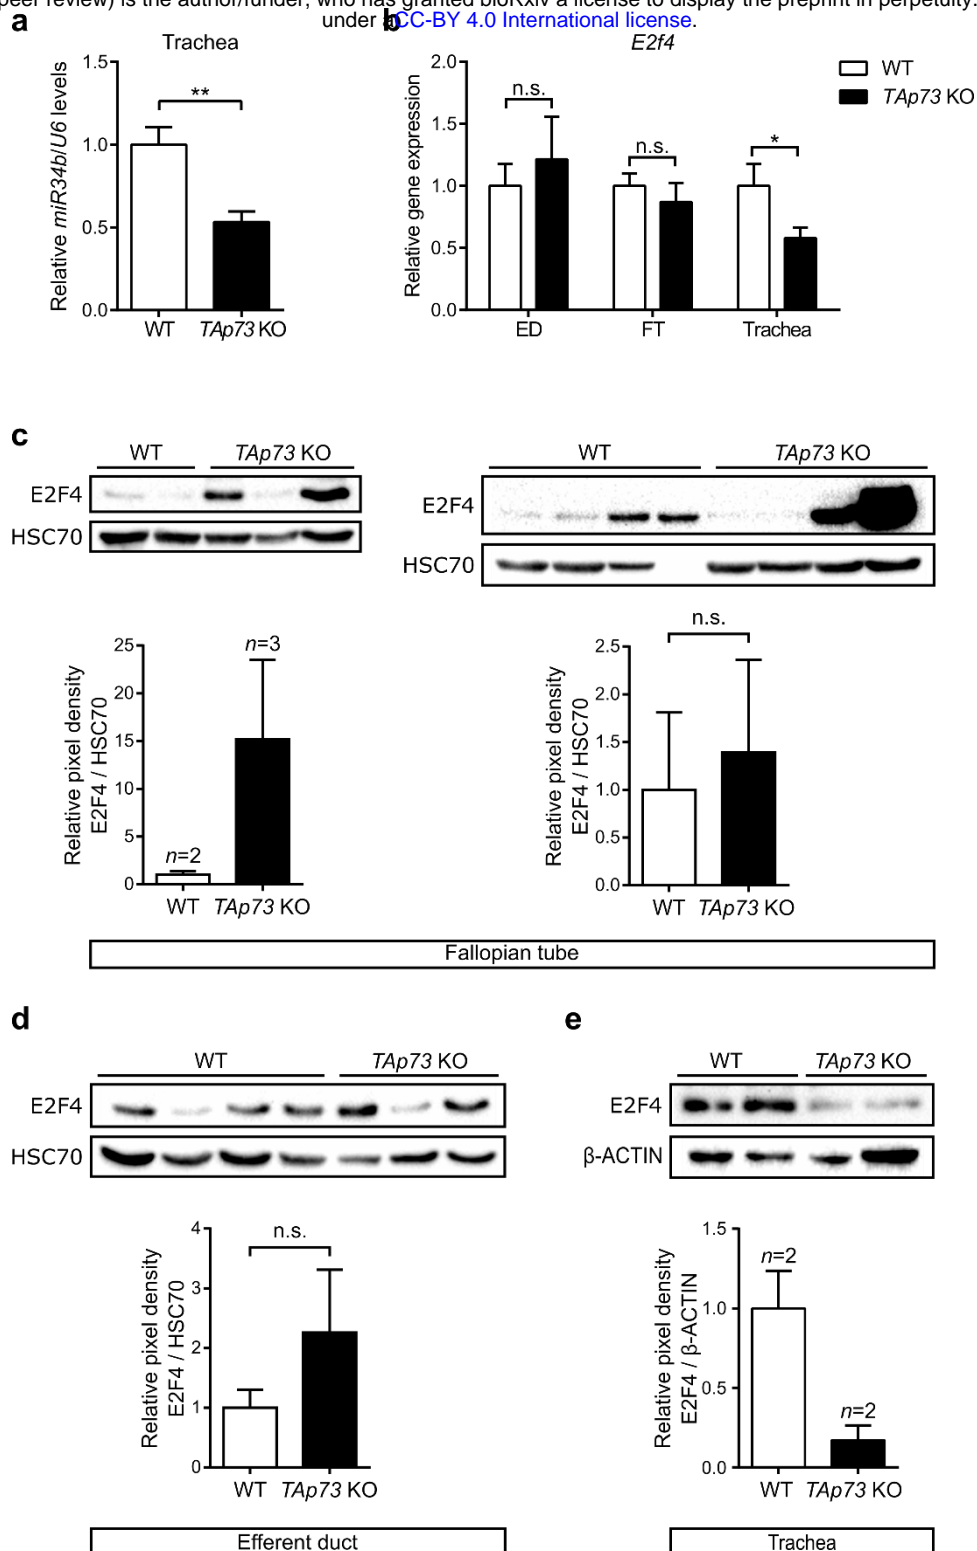

### Supplementary Fig. 7. Analysis of gene expression in multiciliated tissues of *TAp73* KO animals.

(a) Semi-quantitative PCR analysis of *miR34b* expression in trachea from WT and *TAp73* KO mice. Data from a single experiment are shown (WT:  $n=3$ ; *TAp73* KO:  $n=4$ ). (b) Semi-quantitative PCR analysis of *E2f4* expression in brain ventricles, efferent ducts (ED), fallopian tubes (FT), and tracheae from WT and *TAp73* KO mice. Data from a single experiment are shown (WT: ED,  $n=5$ ; FT,  $n=7$ ; trachea,  $n=4$ ; *TAp73* KO: ED,  $n=4$ ; FT,  $n=8$ ; trachea,  $n=4$ ). Immunoblot analysis of the expression of E2F4 in FTs (c), EDs (d), and tracheae (e) from WT and *TAp73* KO animals.  $\beta$ -ACTIN or HSC70 serve as loading controls. Quantitation of the signal intensity of E2F4 bands normalized to that of the loading control is shown below each immunoblot (n.s. non-significant). Representative results from three independent experiments are shown. All data are presented as mean  $\pm$  SEM and relative to the WT group with  $*P < 0.05$ ,  $**P < 0.01$ .

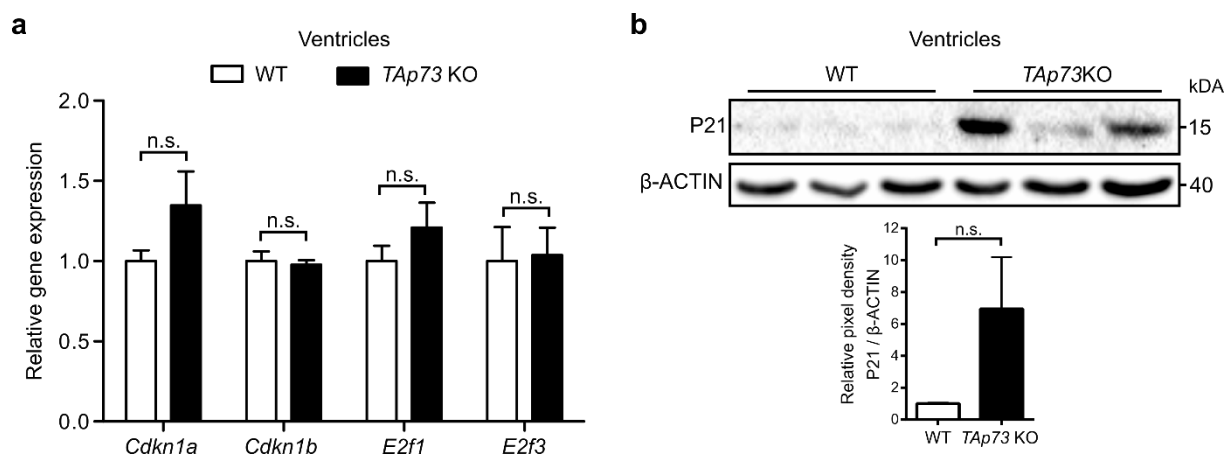

### Supplementary Fig. 8. pRb/E2F pathway activity is not deregulated in *TAp73* KO ventricles.

(a) Semi-quantitative PCR analysis of *Cdkn1a*, *Cdkn1b*, *E2f1*, and *E2f3* in brain ventricles from WT and *TAp73* KO animals. Data from a single experiment are shown ( $n=4$ ). (b) Immunoblot analysis of P21 expression in brain ventricles from WT and *TAp73* KO animals. Data are representative of three independent experiments. Quantitation of the signal intensity of P21 bands relative to that of  $\beta$ -ACTIN is shown ( $n=3$ ). All data are presented as mean  $\pm$  SEM and relative to the WT group.



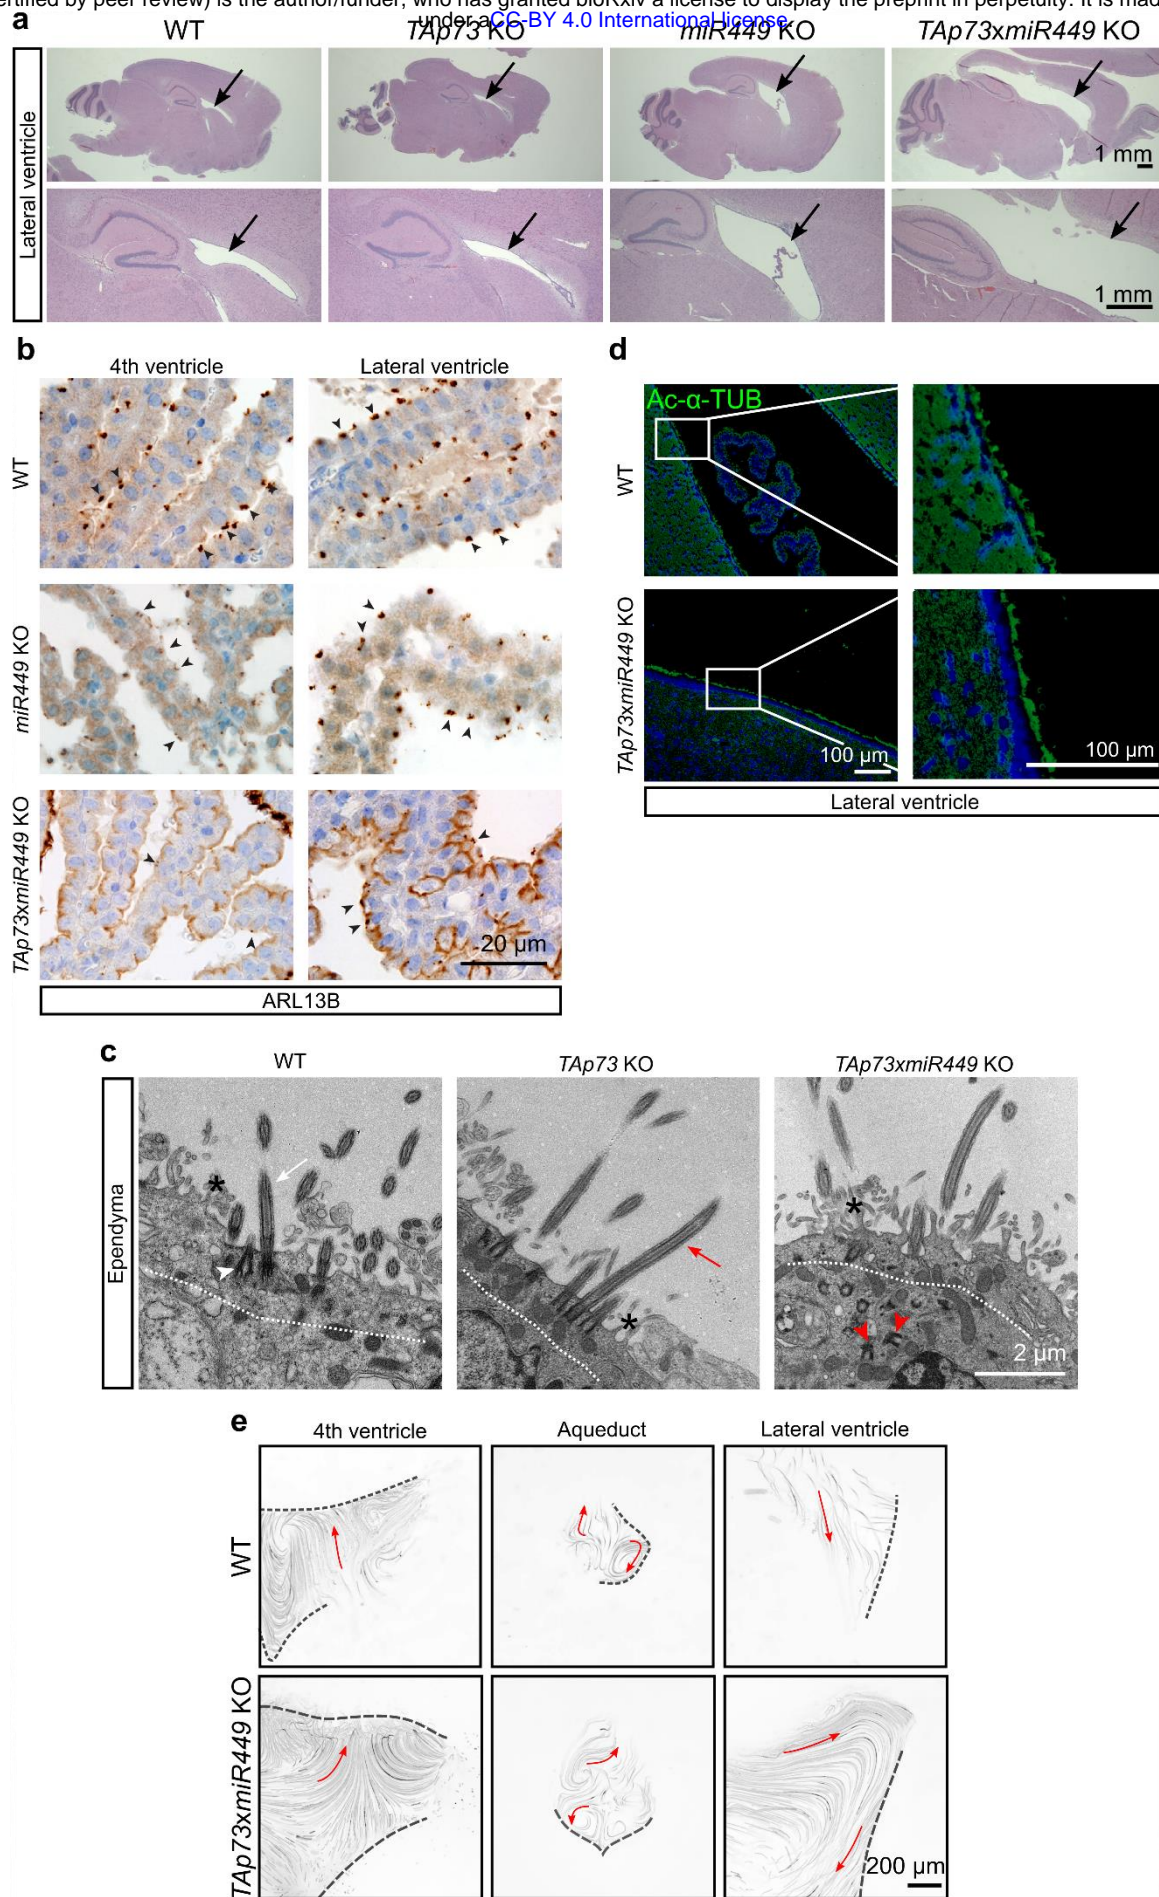

**Supplementary Fig. 9. *miR449* collaborates with *TAp73* in brain multiciliogenesis. (a)**

Representative images of H&E staining of brain sections from WT, *TAp73* KO, *miR449* KO, and *TAp73xmiR449* KO animals. Notice that *TAp73xmiR449* KO mice display enlarged lateral ventricles (arrows). (b) Representative images of the expression of ARL13B in cilia (arrowheads) of CP in the 4<sup>th</sup> and lateral ventricle from WT, *TAp73* KO, *miR449* KO, and *TAp73xmiR449* KO animals. (c) Representative photomicrographs of transmission electron microscopy (TEM) of ependymal cells from WT, *TAp73* KO, and *TAp73xmiR449* KO mice. Dotted lines mark apical region of the cells. Notice that the WT and *TAp73* KO cell possesses abundant cilia (arrows) and basal bodies (arrowhead) docked to the apical surface, whereas the *TAp73xmiR449* KO cell has disorganized basal bodies (red arrowheads) located further away from the apical surface. Interspersed microvilli are marked with asterisks. (d) Expression of Ac- $\alpha$ -TUB (green) in ependymal cells of the lateral ventricle from WT and *TAp73xmiR449* KO mice. Boxed regions are magnified on the right. DAPI staining (blue) labels nuclei. (e) Analysis of the movement of fluorescent beads along the ventricular system from WT and *TAp73xmiR449* KO mice. Images of maximum intensity projections of representative movies of the 4<sup>th</sup> and lateral ventricle, and aqueduct are shown ( $n=2$ ). Red arrows mark the direction of bead flow. Bracket lines delineate ependymal layer lining the ventricles. Refer to **Supplementary Video 3c** for examples of recording of ciliary beating.

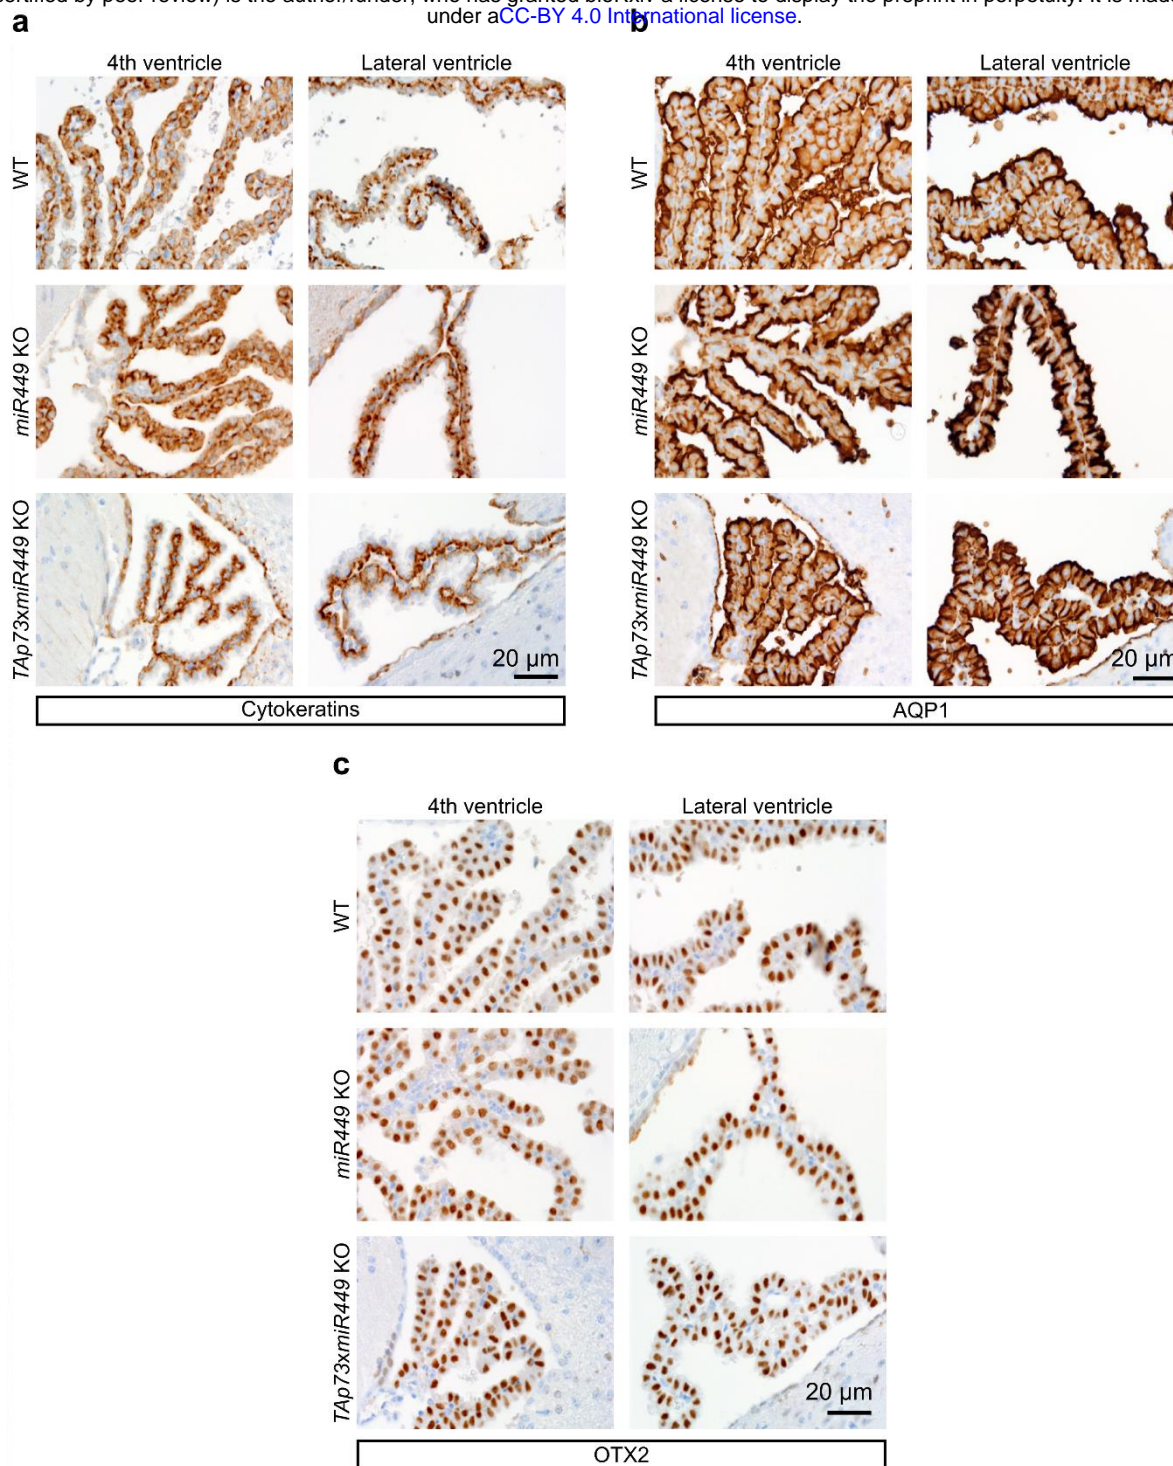

**Supplementary Fig. 10. Combined loss of *TAp73* and *miR449* does not affect epithelial differentiation of choroid plexus cells.** Representative images of the expression of cytokeratins (a), aquaporin 1 (AQP1, b), and orthodenticle homeobox 2 (OTX2, c) in CP epithelium of the 4<sup>th</sup> and lateral ventricles from WT, *miR449* KO, and *TAp73xmiR449* KO mice.

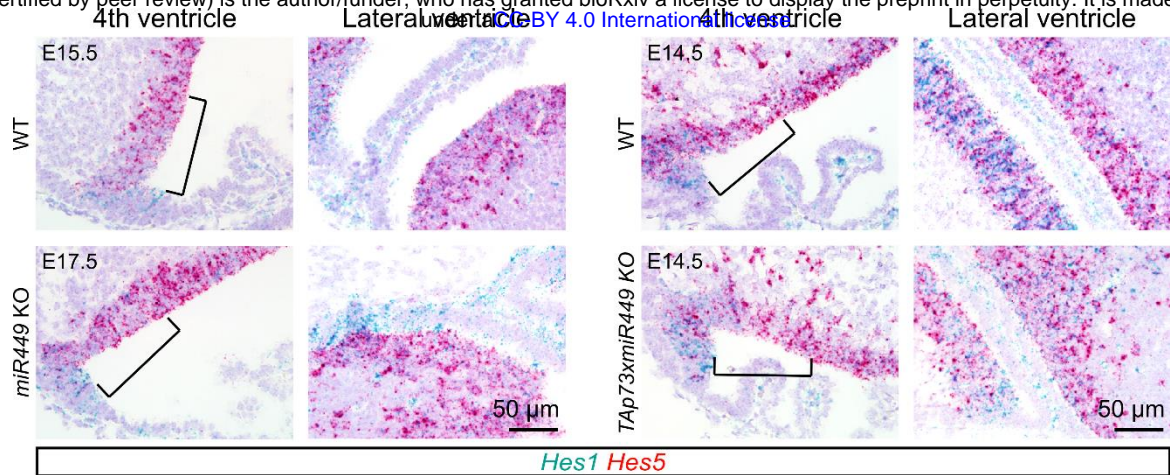

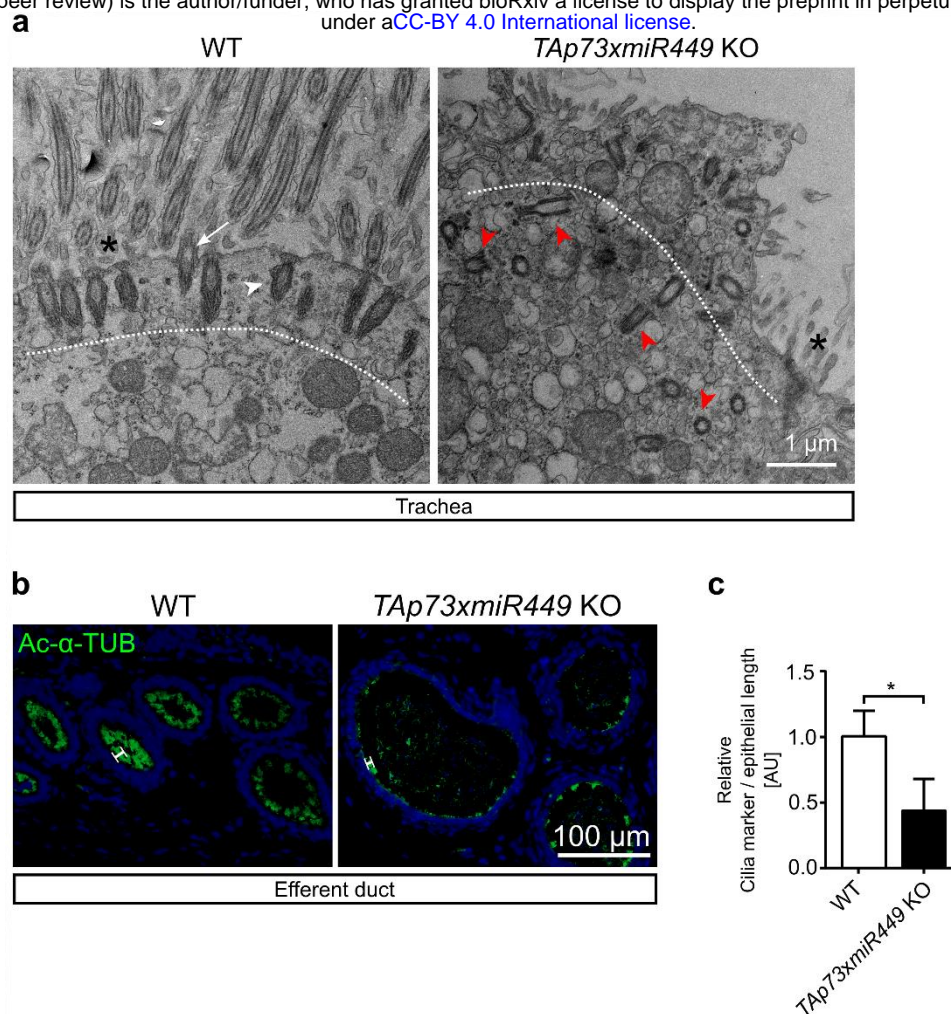

**Supplementary Fig. 12. Additional loss of *miR449* does not exacerbate ciliary defects in the airways and efferent ducts in *TAp73* KO animals.** (a) Representative photomicrographs of transmission electron microscopy (TEM) of trachea from WT and *TAp73xmiR449* KO mice. Dotted lines mark apical region of the cells. Notice the abundant cilia (white arrow) and clustered basal bodies (white arrowhead) docked to apical surface in the WT cell, whereas the mutant cell exhibits disorganized basal bodies (red arrowheads) located away from apical surface. Interspersed microvilli are marked with asterisks. (b) Representative images of the expression of Ac- $\alpha$ -TUB (green) in ED from WT and *TAp73xmiR449* KO mice. DAPI staining (blue) labels nuclei. Notice that mutant cells have less and shorter cilia (white bars) compared to WT mice. (c) Quantitation of Ac- $\alpha$ -TUB signals normalized to epithelial length ( $n=7$  images from 4 WT mice;  $n=6$  images from 3 *TAp73xmiR449* KO mice). Data are presented as mean  $\pm$  SEM and relative to the WT group with  $*P<0.05$ .

## Supplementary Tables

**Supplementary Table 1.** Primary antibody information.

| <b>Antibodies</b>                         | <b>Dilution (Application)</b> | <b>Company</b>                                  | <b>Catalog # [clone]</b> |
|-------------------------------------------|-------------------------------|-------------------------------------------------|--------------------------|
| Mouse monoclonal anti-Ac- $\alpha$ -TUB   | 1:1 000 (IF)                  | Merck<br>(Darmstadt, Germany)                   | T6793 [6-11B-1]          |
| Mouse monoclonal anti-ARL13B              | 1:500 (IF)                    | UC Davis/NIH NeuroMab Facility (Davis, CA, USA) | 75-287 [N295B/66]        |
| Rabbit polyclonal anti-ARL13B             | 1:500 (IHC)                   | Proteintech<br>(Rosemont, IL, USA)              | 17711-1-AP               |
| Mouse monoclonal anti-AQP1                | 1:1 000 (IHC, IF)             | Abcam<br>(Cambridge, UK)                        | ab9566 [1/22]            |
| Rabbit polyclonal anti-AQP1               | 1:1 000 (IF)                  | Merck                                           | AB2219                   |
| Rabbit polyclonal anti- $\beta$ -ACTIN    | 1:10 000 (WB)                 | Abcam                                           | ab8227                   |
| Rabbit polyclonal anti-Cytokeratins       | 1:100 (IHC)                   | Agilent Technologies<br>(Santa Clara, CA, USA)  | Z0622                    |
| Rabbit polyclonal anti-DNAI1              | 1:500 (IF); 1:700 (WB)        | Merck                                           | HPA021649                |
| Goat polyclonal anti-DNAL1                | 1:300 (WB)                    | Santa Cruz Biotechnology<br>(Dallas, TX, USA)   | sc-160296                |
| Mouse monoclonal anti-E2F4                | 1:300 (WB)                    | Santa Cruz Biotechnology                        | sc-6851 [D-3]            |
| Rabbit polyclonal anti-FOXJ1              | 1:500 (WB)                    | Merck                                           | HPA005714                |
| Mouse monoclonal anti-HSC70               | 1:20 000 (WB)                 | Santa Cruz Biotechnology                        | sc-7298 [B-6]            |
| Rabbit monoclonal anti-KI-67              | 1:100 (IF)                    | Abcam                                           | ab16667 [SP6]            |
| Rabbit polyclonal anti-OTX2               | 1:500 (IHC)                   | Merck                                           | AB9566                   |
| Rabbit monoclonal anti-p21                | 1:300 (WB)                    | Abcam                                           | ab188224 [EPR18021]      |
| Rabbit monoclonal anti-P73                | 1:100 (IF, IHC); 1:300 (WB)   | Abcam                                           | ab40658 [EP436Y]         |
| Rabbit polyclonal anti-TTR                | 1:100 (IHC)                   | Proteintech                                     | 1189-1-AP                |
| Rabbit polyclonal anti- $\gamma$ -Tubulin | 1:400 (WB)                    | Merck                                           | T5192                    |

IF= Immunofluorescence, IHC= Immunohistochemistry, WB= Western blot

**Supplementary Table 2. Secondary antibody information.**

| <b>Antibodies</b>                                    | <b>Dilution (Application)</b> | <b>Company</b>                                                   | <b>Catalog #</b> |
|------------------------------------------------------|-------------------------------|------------------------------------------------------------------|------------------|
| Alexa Fluor 488 donkey anti-mouse                    | 1:500 (IF)                    | Invitrogen, Thermo Fisher Scientific ( <i>Waltham, MA, USA</i> ) | A21202           |
| Alexa Fluor 594 goat anti-rabbit                     | 1:500 (IF)                    | Invitrogen, Thermo Fisher Scientific                             | A11012           |
| Peroxidase-conjugated donkey anti-mouse              | 1:10 000 (WB)                 | Jackson ImmunoResearch ( <i>West Grove, PA, USA</i> )            | 715-036-150      |
| Peroxidase-conjugated donkey anti-goat               | 1:10 000 (WB)                 | Jackson ImmunoResearch                                           | 705-036-147      |
| Peroxidase-conjugated donkey anti-rabbit             | 1:10 000 (WB)                 | Jackson ImmunoResearch                                           | 711-036-152      |
| Biotin-SP-conjugated AffiniPure Goat anti-Rabbit IgG | 1:1 000 (IHC)                 | Jackson ImmunoResearch                                           | 111-065-144      |
| Biotin-SP-conjugated AffiniPure Donkey anti-Mouse    | 1:1 000 (IHC)                 | Jackson ImmunoResearch                                           | 111-065-144      |

IF= Immunofluorescence, IHC= Immunohistochemistry, WB= Western blot

**Supplementary Table 3.** Sequence information for primers used in semi-quantitative PCR.

| Gene          | Accession number | Amplification (bp) | Exons   | Forward primer (5' - 3')     | Reverse primer (5' - 3')     |
|---------------|------------------|--------------------|---------|------------------------------|------------------------------|
| <i>TAp73</i>  | NM_011642        | 163                | Ex2-Ex3 | AGCAGAATGAGCGGC<br>AGCGTT    | TGTTGGACTCCTC<br>GCTGCCTGA   |
| <i>Foxj1</i>  | NM_008240        | 200                | Ex2-Ex3 | CCATGCAGACCCCA<br>CCTGGCA    | GGGCAAAGGCAGG<br>GTGGATGT    |
| <i>Dnali1</i> | NM_175223        | 213                | Ex4-Ex5 | TTTGGCATGAGGAAG<br>GCACT     | CTGGTTGGTCCGT<br>TTCAGGA     |
| <i>Mcidas</i> | NM_001037914     | 137                | Ex7     | AACAACGAAAAGGAG<br>CCTGGA    | GCCGCTTAGGGTC<br>ACGATTG     |
| <i>E2f4</i>   | NM_148952        | 199                | Ex7-Ex9 | GCACTGGACACTCG<br>GCCT       | TGCACTCTCTCGTG<br>GGGTCG     |
| <i>E2f1</i>   | NM_007891.5      | 151                | Ex3-Ex4 | AACTGGGCAGCTGA<br>GGTGC      | CAAGCCGCTTACC<br>AATCCC      |
| <i>E2f3</i>   | NM_001359994.1   | 73                 | Ex3     | AAACGCGGTATGATA<br>CGTCCC    | CCATCAGGAGACT<br>GGCTCAG     |
| <i>Cdkn1a</i> | NM_007669.5      | 126                | Ex2-Ex3 | GTGGCCTTGTCGCT<br>GTCTT      | GCGCTTGAGTGA<br>TAGAAATCTG   |
| <i>Cdkn1b</i> | NM_009875.4      | 130                | Ex1-Ex2 | AGTGTCCAGGGATG<br>AGGAAGCGAC | TTCTTGGGCGTCT<br>GCTCCACAGTG |
| <i>Rfx2</i>   | NM_027787        | 74                 | Ex5-Ex6 | GACGGCACAAGACA<br>CTCTCTG    | AGAGTCTCAATCG<br>CCATTTCAAG  |
| <i>Rfx3</i>   | NM_001360357     | 107                | Ex3     | ATGCAGACTTCAGAG<br>ACGGGT    | ACTGGCACTTGCT<br>GTACCAC     |
| <i>36b4</i>   | NM_007475        | 155                | Ex6-Ex7 | GCAGATCGGGTACC<br>CAAC       | CAGCAGCCGCAAA<br>TGCAG       |

**Supplementary Table 4.** Sequence information for primers used in ChIP-qPCR.

| Gene              | Forward primer (5' - 3') | Reverse primer (5' - 3') |
|-------------------|--------------------------|--------------------------|
| <i>FOXJ1 down</i> | CAGCATGCCCAGAAGCTTTG     | TCAGGGGCTGCATTCTTCC      |
| <i>FOXJ1 end</i>  | AGGGCACACTTAGCCTTTG      | AGGAGACAAAGGGAGGAGG      |
| <i>DNAI1</i>      | CCCAAGCGGGGTAATCTCT      | CTTGAGGTTGTGGGACTTCAC    |
| <i>DNALI1</i>     | CACGCCCGGCAAATTTCTG      | CAAGGTGGGCAGATCATGTG     |



**Supplementary Table 5.** Luciferase constructs for E2F4/MCDAS luciferase reporter assay.

RS: Restriction site

| Construct name                                               | DNA sequence of inserts                                                                                                                                                                                                 | Vector  | 5' RS | 3' RS |
|--------------------------------------------------------------|-------------------------------------------------------------------------------------------------------------------------------------------------------------------------------------------------------------------------|---------|-------|-------|
|                                                              | The strongest E2F binding site is depicted in grey and the removed sequence in <b>bold underlined</b> . Two consensus sequences with lower score were retained in the mutant (pink and red).                            |         |       |       |
| <b>miR449/Cdc20b</b><br>WT E2F<br>binding site = <b>WT</b>   | GCCAGAAAGCTGAGCACACTGGGGACT<br>CCGTGATAAAGGGG <b>GAGAGGAAGAT</b> AT<br>TGAGGGTTGAGGAAGAGGTCT <b>GGCGGG</b><br><b>AAATGACAGGGAACC</b> AGATGGGCTGTG<br>CAGCCTTAGCTGCCCATCTGAGCTGCC<br>AAGAGAGCCGAGTTGTGCCATATGGCA<br>GGAG | pGL4.23 | NheI  | EcoRV |
| <b>miR449/Cdc20b</b><br>Mut E2F<br>binding site = <b>Mut</b> | GCCAGAAAGCTGAGCACACTGGGGACT<br>CCGTGATAAAGGGG <b>GAGAGGAAGAT</b> AT<br>TGAGGGTTGAGGAAGAGGTCTG <b>GACAG</b><br><b>GGAACC</b> AGATGGGCTGTGCAGCCTTAG<br>CTGCCCATCTGAGCTGCCAAGAGAGCC<br>GAGTTGTGCCATATGGCAGGAG              | pGL4.23 | NheI  | EcoRV |

**Supplementary Table 6.** Summary of small RNA-seq data from WT ( $n=3$ ) and *TAp73* KO ( $n=4$ ) brains. GEO accession number: **GSE108385**.

- small RNA-seq read counts from WT and *TAp73* KO ventricles
- small RNA-seq differential gene expression results from WT vs. *TAp73* KO ventricles.

## Supplementary Video legends

**Supplementary Video 1.** Movement of spermatozoa from *TAp73<sup>+/-</sup>* (**a, b**) and *TAp73* KO mice (**c, d**).

**Supplementary Video 2.** Smooth muscle contraction in fallopian tubes from WT (**a**) and *TAp73*KO (**b**) mice.

**Supplementary Video 3.** Ciliary beating in WT (**a**, 3<sup>rd</sup> ventricle), *TAp73* KO (**b**, lateral ventricle), and *TAp73xmiR449* KO (**c**, lateral ventricle) mice.

## References

1. Koepfel M, van Heeringen SJ, Kramer D, Smeenk L, Janssen-Megens E, Hartmann M, et al. Crosstalk between c-Jun and TAp73alpha/beta contributes to the apoptosis-survival balance. *Nucleic Acids Res.* 2011;39:6069–85.
